# Supplementary material
Source: PubMed Central journal article supplement (PMC8781987)
Supplement: NIHMS1750159-supplement-Supplementary_Table_S1.pdf [file NIHMS1750159-supplement-Supplementary_Table_S1.pdf]

**Table S1. Prediction of potential candidate target genes of miR-3662 using TargetScan analysis**

| Target gene | Representative transcript | Gene name                                                               | 3P-seq tags + 5 | Total sites | 8mer sites | 7mer-m8 sites | 7mer-A1 sites | 6mer sites | Representative miRNA | Cumulative weighted context ++ score | Total context ++ score | Aggregate PCT |
|-------------|---------------------------|-------------------------------------------------------------------------|-----------------|-------------|------------|---------------|---------------|------------|----------------------|--------------------------------------|------------------------|---------------|
| GUCY1A2     | ENST00000526355.2         | guanylate cyclase 1, soluble, alpha 2                                   | 24              | 11          | 0          | 6             | 5             | 5          | hsa-miR-3662         | -0.19                                | -1.14                  | N/A           |
| KCNJ6       | ENST00000609713.1         | potassium inwardly-rectifying channel, subfamily J, member 6            | 5               | 5           | 0          | 3             | 2             | 10         | hsa-miR-3662         | -1.07                                | -1.07                  | N/A           |
| STX7        | ENST00000367941.2         | syntaxin 7                                                              | 1395            | 10          | 3          | 5             | 2             | 15         | hsa-miR-3662         | -0.03                                | -0.95                  | N/A           |
| NCKAP1      | ENST00000361354.4         | NCK-associated protein 1                                                | 700             | 14*         | 3          | 7             | 3             | 5          | hsa-miR-3662         | -0.06                                | -0.94                  | N/A           |
| UBE2D3      | ENST00000453744.2         | ubiquitin-conjugating enzyme E2D 3                                      | 2312            | 9           | 0          | 2             | 7             | 8          | hsa-miR-3662         | -0.01                                | -0.87                  | N/A           |
| PTPN4       | ENST00000263708.2         | protein tyrosine phosphatase, non-receptor type 4 (megakaryocyte)       | 215             | 12          | 1          | 3             | 8             | 9          | hsa-miR-3662         | -0.36                                | -0.81                  | N/A           |
| VWC2        | ENST00000340652.4         | von Willebrand factor C domain containing 2                             | 5               | 7           | 3          | 1             | 3             | 7          | hsa-miR-3662         | -0.79                                | -0.79                  | N/A           |
| PGAP1       | ENST00000354764.4         | post-GPI attachment to proteins 1                                       | 106             | 11          | 2          | 4             | 5             | 7          | hsa-miR-3662         | -0.51                                | -0.79                  | N/A           |
| HSD17B12    | ENST00000278353.4         | hydroxysteroid (17-beta) dehydrogenase 12                               | 1422            | 6           | 1          | 2             | 3             | 8          | hsa-miR-3662         | -0.06                                | -0.67                  | N/A           |
| CSRNP3      | ENST00000314499.7         | cysteine-serine-rich nuclear protein 3                                  | 24              | 6           | 1          | 2             | 3             | 8          | hsa-miR-3662         | -0.6                                 | -0.6                   | N/A           |
| XKR4        | ENST00000327381.6         | XK, Kell blood group complex subunit-related family, member 4           | 5               | 12          | 2          | 9             | 1             | 12         | hsa-miR-3662         | -0.57                                | -0.57                  | N/A           |
| LY75-CD302  | ENST00000504764.1         | LY75-CD302 readthrough                                                  | 855             | 4           | 0          | 1             | 3             | 5          | hsa-miR-3662         | -0.34                                | -0.56                  | N/A           |
| LY75        | ENST00000554112.1         | lymphocyte antigen 75                                                   | 855             | 4           | 0          | 1             | 3             | 5          | hsa-miR-3662         | -0.34                                | -0.56                  | N/A           |
| CAMTA1      | ENST00000473578.1         | calmodulin binding transcription activator 1                            | 1674            | 3           | 0          | 3             | 0             | 0          | hsa-miR-3662         | -0.54                                | -0.55                  | N/A           |
| GJE1        | ENST00000450456.2         | gap junction protein, epsilon 1, 23kDa                                  | 5               | 2           | 1          | 1             | 0             | 0          | hsa-miR-3662         | -0.51                                | -0.51                  | N/A           |
| QKI         | ENST00000392127.2         | QKI, KH domain containing, RNA binding                                  | 323             | 9           | 0          | 3             | 6             | 9          | hsa-miR-3662         | -0.1                                 | -0.48                  | N/A           |
| MGST3       | ENST00000367889.3         | microsomal glutathione S-transferase 3                                  | 938             | 1           | 1          | 0             | 0             | 3          | hsa-miR-3662         | -0.38                                | -0.46                  | N/A           |
| ZBTB20      | ENST00000462705.1         | zinc finger and BTB domain containing 20                                | 5               | 17          | 5          | 6             | 6             | 11         | hsa-miR-3662         | -0.04                                | -0.45                  | N/A           |
| GPR18       | ENST00000397473.2         | G protein-coupled receptor 18                                           | 5               | 1           | 1          | 0             | 0             | 1          | hsa-miR-3662         | -0.45                                | -0.45                  | N/A           |
| CCDC50      | ENST00000392455.3         | coiled-coil domain containing 50                                        | 961             | 5           | 0          | 2             | 3             | 6          | hsa-miR-3662         | -0.25                                | -0.45                  | N/A           |
| TMEM106B    | ENST00000396667.3         | transmembrane protein 106B                                              | 615             | 9           | 0          | 5             | 4             | 7          | hsa-miR-3662         | -0.01                                | -0.44                  | N/A           |
| SUPT4H1     | ENST00000225504.3         | suppressor of Ty 4 homolog 1 (S. cerevisiae)                            | 6325            | 2           | 2          | 0             | 0             | 3          | hsa-miR-3662         | -0.42                                | -0.42                  | N/A           |
| AP5M1       | ENST00000261558.3         | adaptor-related protein complex 5, mu 1 subunit                         | 198             | 10          | 1          | 6             | 3             | 5          | hsa-miR-3662         | -0.14                                | -0.41                  | N/A           |
| UNC5C       | ENST00000453304.1         | unc-5 homolog C (C. elegans)                                            | 60              | 3           | 0          | 3             | 0             | 7          | hsa-miR-3662         | -0.29                                | -0.4                   | N/A           |
| SMIM15      | ENST00000339020.3         | small integral membrane protein 15                                      | 1037            | 5           | 0          | 1             | 4             | 4          | hsa-miR-3662         | -0.09                                | -0.4                   | N/A           |
| PTS         | ENST00000525803.1         | 6-pyruvoyltetrahydropterin synthase                                     | 1526            | 2           | 1          | 1             | 0             | 1          | hsa-miR-3662         | -0.13                                | -0.4                   | N/A           |
| C12orf76    | ENST00000546651.2         | chromosome 12 open reading frame 76                                     | 62              | 2           | 1          | 1             | 0             | 1          | hsa-miR-3662         | -0.36                                | -0.4                   | N/A           |
| AIMP2       | ENST00000223029.3         | aminoacyl tRNA synthetase complex-interacting multifunctional protein 2 | 2844            | 1           | 1          | 0             | 0             | 0          | hsa-miR-3662         | 0                                    | -0.4                   | N/A           |
| AGO2        | ENST00000220592.5         | argonaute RISC catalytic component 2                                    | 350             | 1           | 0          | 0             | 1             | 1          | hsa-miR-3662         | -0.02                                | -0.4                   | N/A           |
| PKIA        | ENST00000396418.2         | protein kinase (cAMP-dependent, catalytic) inhibitor alpha              | 542             | 10          | 4          | 5             | 1             | 7          | hsa-miR-3662         | -0.1                                 | -0.39                  | N/A           |
| ISCA2       | ENST00000554924.1         | iron-sulfur cluster assembly 2                                          | 135             | 5           | 2          | 0             | 3             | 0          | hsa-miR-3662         | -0.22                                | -0.39                  | N/A           |
| ZNF66       | ENST00000594534.1         | zinc finger protein 66                                                  | 2               | 3           | 1          | 1             | 1             | 0          | hsa-miR-3662         | -0.38                                | -0.38                  | N/A           |

|             |                   |                                                                           |      |    |   |    |   |    |              |       |       |     |
|-------------|-------------------|---------------------------------------------------------------------------|------|----|---|----|---|----|--------------|-------|-------|-----|
| PPM1L       | ENST00000498165.1 | protein phosphatase, Mg2+/Mn2+ dependent, 1L                              | 59   | 8  | 1 | 3  | 4 | 6  | hsa-miR-3662 | -0.16 | -0.38 | N/A |
| LRP12       | ENST00000424843.2 | low density lipoprotein receptor-related protein 12                       | 378  | 4  | 1 | 1  | 2 | 4  | hsa-miR-3662 | -0.1  | -0.38 | N/A |
| MND1        | ENST00000240488.3 | meiotic nuclear divisions 1 homolog (S. cerevisiae)                       | 1780 | 1  | 1 | 0  | 0 | 0  | hsa-miR-3662 | -0.36 | -0.37 | N/A |
| CFHR2       | ENST00000367421.3 | complement factor H-related 2                                             | 5    | 3  | 0 | 3  | 0 | 3  | hsa-miR-3662 | -0.32 | -0.36 | N/A |
| PPBP        | ENST00000296028.3 | pro-platelet basic protein (chemokine (C-X-C motif) ligand 7)             | 5    | 3  | 1 | 1  | 1 | 2  | hsa-miR-3662 | -0.12 | -0.36 | N/A |
| FZD3        | ENST00000240093.3 | frizzled family receptor 3                                                | 192  | 12 | 4 | 4  | 4 | 7  | hsa-miR-3662 | -0.31 | -0.36 | N/A |
| CMC1        | ENST00000466830.1 | COX assembly mitochondrial protein 1 homolog (S. cerevisiae)              | 1203 | 3  | 1 | 2  | 0 | 6  | hsa-miR-3662 | -0.3  | -0.36 | N/A |
| RP11-9B6.1  | ENST00000504213.1 | HCG2045747; Uncharacterized protein                                       | 5    | 1  | 0 | 1  | 0 | 2  | hsa-miR-3662 | -0.35 | -0.35 | N/A |
| NUDCD2      | ENST00000302764.4 | NudC domain containing 2                                                  | 308  | 12 | 1 | 6  | 5 | 7  | hsa-miR-3662 | -0.09 | -0.35 | N/A |
| FCN3        | ENST00000270879.4 | ficolin (collagen/fibrinogen domain containing) 3                         | 5    | 1  | 1 | 0  | 0 | 0  | hsa-miR-3662 | -0.35 | -0.35 | N/A |
| ABI2        | ENST00000295851.5 | abl-interactor 2                                                          | 877  | 6  | 0 | 1  | 5 | 13 | hsa-miR-3662 | -0.01 | -0.35 | N/A |
| C8orf22     | ENST00000303202.8 | chromosome 8 open reading frame 22                                        | 5    | 2  | 0 | 2  | 0 | 2  | hsa-miR-3662 | -0.34 | -0.34 | N/A |
| DNAJC10     | ENST00000264065.7 | DnaJ (Hsp40) homolog, subfamily C, member 10                              | 709  | 15 | 1 | 7  | 7 | 8  | hsa-miR-3662 | -0.01 | -0.34 | N/A |
| CREB1       | ENST00000432329.2 | cAMP responsive element binding protein 1                                 | 295  | 9  | 2 | 3  | 4 | 9  | hsa-miR-3662 | -0.14 | -0.34 | N/A |
| BCL2L15     | ENST00000393316.3 | BCL2-like 15                                                              | 5    | 6  | 1 | 4  | 1 | 4  | hsa-miR-3662 | -0.25 | -0.34 | N/A |
| ADAT2       | ENST00000606514.1 | adenosine deaminase, tRNA-specific 2                                      | 303  | 9  | 1 | 4  | 4 | 3  | hsa-miR-3662 | -0.05 | -0.34 | N/A |
| TMEM182     | ENST00000412401.2 | transmembrane protein 182                                                 | 69   | 3  | 1 | 2  | 0 | 3  | hsa-miR-3662 | -0.27 | -0.33 | N/A |
| SH3TC2      | ENST00000502274.1 | SH3 domain and tetratricopeptide repeats 2                                | 31   | 18 | 2 | 10 | 6 | 8  | hsa-miR-3662 | 0     | -0.33 | N/A |
| AC090186.1  | ENST00000415643.1 | Uncharacterized protein                                                   | 5    | 2  | 0 | 2  | 0 | 0  | hsa-miR-3662 | -0.32 | -0.32 | N/A |
| RP11-3B7.1  | ENST00000440528.3 | Uncharacterized protein                                                   | 8    | 2  | 1 | 1  | 0 | 0  | hsa-miR-3662 | -0.32 | -0.32 | N/A |
| REEP5       | ENST00000545426.1 | receptor accessory protein 5                                              | 4440 | 2  | 1 | 0  | 1 | 3  | hsa-miR-3662 | 0     | -0.32 | N/A |
| MYCBP2      | ENST00000544440.2 | MYC binding protein 2, E3 ubiquitin protein ligase                        | 343  | 1  | 0 | 1  | 0 | 4  | hsa-miR-3662 | -0.17 | -0.32 | N/A |
| IFIT1       | ENST00000371804.3 | interferon-induced protein with tetratricopeptide repeats 1               | 72   | 3  | 2 | 0  | 1 | 2  | hsa-miR-3662 | -0.28 | -0.32 | N/A |
| DOCK7       | ENST00000251157.5 | dedicator of cytokinesis 7                                                | 66   | 5  | 0 | 2  | 3 | 2  | hsa-miR-3662 | -0.19 | -0.32 | N/A |
| RGS17       | ENST00000367225.2 | regulator of G-protein signaling 17                                       | 11   | 6  | 2 | 3  | 1 | 8  | hsa-miR-3662 | -0.18 | -0.31 | N/A |
| RAB3B       | ENST00000371655.3 | RAB3B, member RAS oncogene family                                         | 611  | 4  | 0 | 2  | 2 | 3  | hsa-miR-3662 | -0.04 | -0.31 | N/A |
| PIK3C2G     | ENST00000433979.1 | phosphatidylinositol-4-phosphate 3-kinase, catalytic subunit type 2 gamma | 5    | 1  | 1 | 0  | 0 | 0  | hsa-miR-3662 | -0.31 | -0.31 | N/A |
| ATP5S       | ENST00000245448.6 | ATP synthase, H+ transporting, mitochondrial Fo complex, subunit s (fa    | 310  | 7  | 3 | 2  | 2 | 2  | hsa-miR-3662 | -0.06 | -0.31 | N/A |
| CCR8        | ENST00000414803.1 | chemokine (C-C motif) receptor 8                                          | 5    | 2  | 1 | 0  | 1 | 2  | hsa-miR-3662 | -0.3  | -0.3  | N/A |
| C21orf37    | ENST00000440664.1 | chromosome 21 open reading frame 37                                       | 5    | 1  | 1 | 0  | 0 | 0  | hsa-miR-3662 | -0.3  | -0.3  | N/A |
| IL22        | ENST00000538666.1 | interleukin 22                                                            | 5    | 2  | 1 | 0  | 1 | 0  | hsa-miR-3662 | -0.3  | -0.3  | N/A |
| EBNA1BP2    | ENST00000431635.2 | EBNA1 binding protein 2                                                   | 930  | 5  | 4 | 1  | 0 | 2  | hsa-miR-3662 | -0.17 | -0.3  | N/A |
| CCDC38      | ENST00000546386.1 | coiled-coil domain containing 38                                          | 10   | 2  | 1 | 1  | 0 | 1  | hsa-miR-3662 | -0.22 | -0.3  | N/A |
| CAMK4       | ENST00000282356.4 | calcium/calmodulin-dependent protein kinase IV                            | 73   | 17 | 3 | 5  | 9 | 10 | hsa-miR-3662 | -0.21 | -0.3  | N/A |
| AGL         | ENST00000370161.2 | amylo-alpha-1, 6-glucosidase, 4-alpha-glucanotransferase                  | 48   | 1  | 0 | 1  | 0 | 3  | hsa-miR-3662 | -0.3  | -0.3  | N/A |
| RP6-24A23.6 | ENST00000563887.1 | Uncharacterized protein                                                   | 937  | 4  | 0 | 1  | 3 | 1  | hsa-miR-3662 | -0.14 | -0.29 | N/A |
| ZNF280C     | ENST00000370978.4 | zinc finger protein 280C                                                  | 138  | 4  | 0 | 2  | 2 | 8  | hsa-miR-3662 | -0.19 | -0.29 | N/A |
| TBCB        | ENST00000586868.1 | tubulin folding cofactor B                                                | 1224 | 2  | 0 | 1  | 1 | 0  | hsa-miR-3662 | -0.29 | -0.29 | N/A |
| RAB30       | ENST00000533486.1 | RAB30, member RAS oncogene family                                         | 274  | 3  | 1 | 0  | 2 | 3  | hsa-miR-3662 | -0.18 | -0.29 | N/A |

|            |                   |                                                                 |      |    |   |   |   |    |              |       |       |     |
|------------|-------------------|-----------------------------------------------------------------|------|----|---|---|---|----|--------------|-------|-------|-----|
| PPIL4      | ENST00000340881.2 | peptidylprolyl isomerase (cyclophilin)-like 4                   | 1565 | 8  | 1 | 5 | 2 | 12 | hsa-miR-3662 | -0.05 | -0.29 | N/A |
| ITGA1      | ENST00000282588.6 | integrin, alpha 1                                               | 400  | 7  | 1 | 5 | 1 | 6  | hsa-miR-3662 | -0.09 | -0.29 | N/A |
| HOOK3      | ENST00000307602.4 | hook microtubule-tethering protein 3                            | 403  | 15 | 3 | 8 | 4 | 7  | hsa-miR-3662 | -0.2  | -0.29 | N/A |
| GTF2A2     | ENST00000396060.2 | general transcription factor IIA, 2, 12kDa                      | 1068 | 2  | 1 | 0 | 1 | 1  | hsa-miR-3662 | -0.24 | -0.29 | N/A |
| GLIPR1L1   | ENST00000312442.2 | GLI pathogenesis-related 1 like 1                               | 5    | 1  | 1 | 0 | 0 | 0  | hsa-miR-3662 | -0.29 | -0.29 | N/A |
| ARL15      | ENST00000502271.1 | ADP-ribosylation factor-like 15                                 | 119  | 2  | 1 | 1 | 0 | 0  | hsa-miR-3662 | -0.29 | -0.29 | N/A |
| ZNF460     | ENST00000360338.3 | zinc finger protein 460                                         | 164  | 13 | 4 | 7 | 2 | 18 | hsa-miR-3662 | -0.25 | -0.28 | N/A |
| SSH2       | ENST00000582084.1 | slingshot protein phosphatase 2                                 | 190  | 6  | 0 | 4 | 2 | 0  | hsa-miR-3662 | -0.03 | -0.28 | N/A |
| PSMA8      | ENST00000343848.6 | proteasome (prosome, macropain) subunit, alpha type, 8          | 5    | 3  | 3 | 0 | 0 | 0  | hsa-miR-3662 | -0.28 | -0.28 | N/A |
| PPP2CB     | ENST00000221138.4 | protein phosphatase 2, catalytic subunit, beta isozyme          | 11   | 1  | 1 | 0 | 0 | 1  | hsa-miR-3662 | -0.24 | -0.28 | N/A |
| MKLN1      | ENST00000352689.6 | muskelin 1, intracellular mediator containing kelch motifs      | 477  | 4  | 0 | 3 | 1 | 4  | hsa-miR-3662 | -0.18 | -0.28 | N/A |
| KLRC2      | ENST00000381902.2 | killer cell lectin-like receptor subfamily C, member 2          | 5    | 3  | 1 | 1 | 1 | 0  | hsa-miR-3662 | -0.28 | -0.28 | N/A |
| EIF3E      | ENST00000220849.5 | eukaryotic translation initiation factor 3, subunit E           | 906  | 1  | 1 | 0 | 0 | 1  | hsa-miR-3662 | -0.28 | -0.28 | N/A |
| AC012360.2 | ENST00000595531.1 | LOC644617 protein; Uncharacterized protein                      | 430  | 2  | 1 | 1 | 0 | 1  | hsa-miR-3662 | -0.22 | -0.27 | N/A |
| USP14      | ENST00000261601.7 | ubiquitin specific peptidase 14 (tRNA-guanine transglycosylase) | 561  | 3  | 0 | 1 | 2 | 3  | hsa-miR-3662 | -0.17 | -0.27 | N/A |
| STRN       | ENST00000263918.4 | striatin, calmodulin binding protein                            | 476  | 10 | 5 | 2 | 3 | 7  | hsa-miR-3662 | -0.17 | -0.27 | N/A |
| SSB        | ENST00000260956.4 | Sjogren syndrome antigen B (autoantigen La)                     | 373  | 1  | 1 | 0 | 0 | 0  | hsa-miR-3662 | -0.27 | -0.27 | N/A |
| RNF217     | ENST00000521654.2 | ring finger protein 217                                         | 92   | 12 | 5 | 5 | 2 | 7  | hsa-miR-3662 | -0.07 | -0.27 | N/A |
| RFESD      | ENST00000513950.2 | Rieske (Fe-S) domain containing                                 | 15   | 3  | 1 | 0 | 2 | 2  | hsa-miR-3662 | -0.05 | -0.27 | N/A |
| PHYHIP1L   | ENST00000373880.4 | phytanoyl-CoA 2-hydroxylase interacting protein-like            | 26   | 4  | 1 | 1 | 2 | 3  | hsa-miR-3662 | -0.22 | -0.27 | N/A |
| GNG4       | ENST00000450593.1 | guanine nucleotide binding protein (G protein), gamma 4         | 1171 | 4  | 0 | 4 | 0 | 1  | hsa-miR-3662 | -0.23 | -0.27 | N/A |
| CPXCR1     | ENST00000276127.4 | CPX chromosome region, candidate 1                              | 5    | 1  | 1 | 0 | 0 | 0  | hsa-miR-3662 | -0.27 | -0.27 | N/A |
| CLP1       | ENST00000533682.1 | cleavage and polyadenylation factor I subunit 1                 | 208  | 1  | 1 | 0 | 0 | 0  | hsa-miR-3662 | -0.27 | -0.27 | N/A |
| GRXCR1     | ENST00000399770.2 | glutaredoxin, cysteine rich 1                                   | 5    | 1  | 1 | 0 | 0 | 0  | hsa-miR-3662 | -0.26 | -0.26 | N/A |
| C9orf53    | ENST00000441769.2 | chromosome 9 open reading frame 53                              | 5    | 1  | 1 | 0 | 0 | 0  | hsa-miR-3662 | -0.26 | -0.26 | N/A |
| AMER2      | ENST00000357816.2 | APC membrane recruitment protein 2                              | 7    | 4  | 0 | 0 | 4 | 7  | hsa-miR-3662 | -0.2  | -0.26 | N/A |
| SRSF1      | ENST00000258962.4 | serine/arginine-rich splicing factor 1                          | 1430 | 11 | 1 | 6 | 4 | 9  | hsa-miR-3662 | -0.14 | -0.26 | N/A |
| NOL7       | ENST00000451315.2 | nucleolar protein 7, 27kDa                                      | 1168 | 2  | 1 | 0 | 1 | 0  | hsa-miR-3662 | -0.03 | -0.26 | N/A |
| MAP2K6     | ENST00000590474.1 | mitogen-activated protein kinase kinase 6                       | 235  | 11 | 2 | 4 | 5 | 10 | hsa-miR-3662 | -0.03 | -0.26 | N/A |
| GPR34      | ENST00000378142.4 | G protein-coupled receptor 34                                   | 5    | 1  | 1 | 0 | 0 | 1  | hsa-miR-3662 | -0.26 | -0.26 | N/A |
| KRTAP9-3   | ENST00000411528.2 | keratin associated protein 9-3                                  | 5    | 1  | 1 | 0 | 0 | 0  | hsa-miR-3662 | -0.25 | -0.25 | N/A |
| ZBTB37     | ENST00000367701.5 | zinc finger and BTB domain containing 37                        | 213  | 7  | 2 | 4 | 1 | 8  | hsa-miR-3662 | -0.23 | -0.25 | N/A |
| TIMM21     | ENST00000169551.6 | translocase of inner mitochondrial membrane 21 homolog (yeast)  | 306  | 1  | 1 | 0 | 0 | 1  | hsa-miR-3662 | -0.08 | -0.25 | N/A |
| SOD2       | ENST00000538183.2 | superoxide dismutase 2, mitochondrial                           | 993  | 5  | 0 | 4 | 1 | 9  | hsa-miR-3662 | -0.02 | -0.25 | N/A |
| SNAPIN     | ENST00000368685.5 | SNAP-associated protein                                         | 1843 | 2  | 1 | 1 | 0 | 0  | hsa-miR-3662 | -0.23 | -0.25 | N/A |
| SLC41A2    | ENST00000258538.3 | solute carrier family 41 (magnesium transporter), member 2      | 224  | 3  | 0 | 2 | 1 | 4  | hsa-miR-3662 | -0.1  | -0.25 | N/A |
| MCTS1      | ENST00000371317.5 | malignant T cell amplified sequence 1                           | 6611 | 8  | 1 | 2 | 5 | 5  | hsa-miR-3662 | 0     | -0.25 | N/A |
| LRRC40     | ENST00000370952.3 | leucine rich repeat containing 40                               | 88   | 11 | 4 | 3 | 4 | 7  | hsa-miR-3662 | -0.04 | -0.25 | N/A |
| KLF12      | ENST00000377669.2 | Kruppel-like factor 12                                          | 251  | 12 | 2 | 7 | 3 | 6  | hsa-miR-3662 | -0.23 | -0.25 | N/A |

|           |                   |                                                                        |      |    |   |   |   |    |              |       |       |     |
|-----------|-------------------|------------------------------------------------------------------------|------|----|---|---|---|----|--------------|-------|-------|-----|
| FBXO43    | ENST00000428847.2 | F-box protein 43                                                       | 133  | 4  | 1 | 1 | 2 | 0  | hsa-miR-3662 | -0.16 | -0.25 | N/A |
| EXOC5     | ENST00000413566.2 | exocyst complex component 5                                            | 242  | 8  | 2 | 3 | 3 | 7  | hsa-miR-3662 | -0.2  | -0.25 | N/A |
| ENSA      | ENST00000369014.5 | endosulfine alpha                                                      | 167  | 3  | 2 | 0 | 1 | 0  | hsa-miR-3662 | -0.21 | -0.25 | N/A |
| C17orf67  | ENST00000397861.2 | chromosome 17 open reading frame 67                                    | 5    | 2  | 1 | 0 | 1 | 0  | hsa-miR-3662 | -0.25 | -0.25 | N/A |
| ARMC1     | ENST00000276569.3 | armadillo repeat containing 1                                          | 93   | 3  | 0 | 1 | 2 | 2  | hsa-miR-3662 | -0.2  | -0.25 | N/A |
| CLEC6A    | ENST00000382073.3 | C-type lectin domain family 6, member A                                | 5    | 3  | 1 | 1 | 1 | 0  | hsa-miR-3662 | -0.24 | -0.24 | N/A |
| GPHA2     | ENST00000279168.2 | glycoprotein hormone alpha 2                                           | 8    | 1  | 1 | 0 | 0 | 0  | hsa-miR-3662 | -0.24 | -0.24 | N/A |
| RIF1      | ENST00000243326.5 | RAP1 interacting factor homolog (yeast)                                | 213  | 6  | 0 | 3 | 3 | 6  | hsa-miR-3662 | -0.1  | -0.24 | N/A |
| NUP62CL   | ENST00000372461.3 | nucleoporin 62kDa C-terminal like                                      | 73   | 2  | 1 | 0 | 1 | 4  | hsa-miR-3662 | -0.06 | -0.24 | N/A |
| MMGT1     | ENST00000305963.2 | membrane magnesium transporter 1                                       | 113  | 4  | 0 | 1 | 3 | 1  | hsa-miR-3662 | -0.07 | -0.24 | N/A |
| LIN7C     | ENST00000278193.2 | lin-7 homolog C (C. elegans)                                           | 1701 | 4  | 1 | 3 | 0 | 4  | hsa-miR-3662 | -0.21 | -0.24 | N/A |
| EIF4E     | ENST00000450253.2 | eukaryotic translation initiation factor 4E                            | 876  | 9  | 2 | 3 | 4 | 3  | hsa-miR-3662 | -0.07 | -0.24 | N/A |
| DPYS      | ENST00000351513.2 | dihydropyrimidinase                                                    | 7    | 2  | 1 | 1 | 0 | 0  | hsa-miR-3662 | -0.24 | -0.24 | N/A |
| DGKH      | ENST00000261491.5 | diacylglycerol kinase, eta                                             | 46   | 11 | 4 | 5 | 2 | 10 | hsa-miR-3662 | -0.15 | -0.24 | N/A |
| TMEM9B    | ENST00000309134.5 | TMEM9 domain family, member B                                          | 195  | 1  | 1 | 0 | 0 | 2  | hsa-miR-3662 | -0.19 | -0.23 | N/A |
| PTAR1     | ENST00000377200.5 | protein prenyltransferase alpha subunit repeat containing 1            | 161  | 10 | 5 | 3 | 2 | 6  | hsa-miR-3662 | -0.15 | -0.23 | N/A |
| MELK      | ENST00000536987.1 | maternal embryonic leucine zipper kinase                               | 5978 | 5  | 1 | 1 | 3 | 6  | hsa-miR-3662 | 0     | -0.23 | N/A |
| LOX       | ENST00000231004.4 | lysyl oxidase                                                          | 3441 | 8  | 3 | 3 | 2 | 0  | hsa-miR-3662 | -0.07 | -0.23 | N/A |
| IMPG1     | ENST00000369963.3 | interphotoreceptor matrix proteoglycan 1                               | 5    | 6  | 2 | 3 | 1 | 4  | hsa-miR-3662 | -0.23 | -0.23 | N/A |
| FAM208B   | ENST00000328090.5 | family with sequence similarity 208, member B                          | 42   | 5  | 2 | 3 | 0 | 1  | hsa-miR-3662 | -0.18 | -0.23 | N/A |
| FAM104B   | ENST00000472571.2 | family with sequence similarity 104, member B                          | 599  | 2  | 0 | 1 | 1 | 0  | hsa-miR-3662 | -0.11 | -0.23 | N/A |
| CTHRC1    | ENST00000330295.5 | collagen triple helix repeat containing 1                              | 1504 | 2  | 0 | 1 | 1 | 1  | hsa-miR-3662 | -0.22 | -0.23 | N/A |
| CGGBP1    | ENST00000309534.6 | CGG triplet repeat binding protein 1                                   | 990  | 5  | 1 | 2 | 2 | 2  | hsa-miR-3662 | -0.11 | -0.23 | N/A |
| C17orf80  | ENST00000359042.2 | chromosome 17 open reading frame 80                                    | 740  | 2  | 1 | 0 | 1 | 1  | hsa-miR-3662 | -0.22 | -0.23 | N/A |
| BRWD1     | ENST00000342449.3 | bromodomain and WD repeat domain containing 1                          | 96   | 10 | 1 | 6 | 3 | 7  | hsa-miR-3662 | -0.05 | -0.23 | N/A |
| ARHGEF6   | ENST00000370620.1 | Rac/Cdc42 guanine nucleotide exchange factor (GEF) 6                   | 15   | 2  | 1 | 1 | 0 | 2  | hsa-miR-3662 | -0.17 | -0.23 | N/A |
| ALG11     | ENST00000523764.1 | ALG11, alpha-1,2-mannosyltransferase                                   | 121  | 1  | 1 | 0 | 0 | 0  | hsa-miR-3662 | -0.01 | -0.23 | N/A |
| PRAMEF2   | ENST00000240189.2 | PRAME family member 2                                                  | 5    | 1  | 0 | 1 | 0 | 0  | hsa-miR-3662 | -0.22 | -0.22 | N/A |
| TMPRSS11B | ENST00000332644.5 | transmembrane protease, serine 11B                                     | 5    | 3  | 3 | 0 | 0 | 1  | hsa-miR-3662 | -0.22 | -0.22 | N/A |
| JHDM1D    | ENST00000397560.2 | jumonji C domain containing histone demethylase 1 homolog D (S. cere   | 470  | 10 | 3 | 6 | 1 | 4  | hsa-miR-3662 | -0.19 | -0.22 | N/A |
| FMO3      | ENST00000367755.4 | flavin containing monooxygenase 3                                      | 5    | 1  | 0 | 0 | 1 | 2  | hsa-miR-3662 | -0.08 | -0.22 | N/A |
| ZNF736    | ENST00000423484.2 | zinc finger protein 736                                                | 36   | 4  | 1 | 1 | 2 | 3  | hsa-miR-3662 | -0.12 | -0.22 | N/A |
| TP53INP1  | ENST00000448464.2 | tumor protein p53 inducible nuclear protein 1                          | 39   | 8  | 1 | 4 | 3 | 4  | hsa-miR-3662 | -0.14 | -0.22 | N/A |
| TAF7L     | ENST00000372907.3 | TAF7-like RNA polymerase II, TATA box binding protein (TBP)-associat   | 51   | 1  | 1 | 0 | 0 | 0  | hsa-miR-3662 | -0.22 | -0.22 | N/A |
| SGCE      | ENST00000265735.7 | sarcoglycan, epsilon                                                   | 57   | 1  | 1 | 0 | 0 | 1  | hsa-miR-3662 | -0.22 | -0.22 | N/A |
| PERP      | ENST00000421351.3 | PERP, TP53 apoptosis effector                                          | 437  | 4  | 3 | 0 | 1 | 3  | hsa-miR-3662 | -0.14 | -0.22 | N/A |
| MLLT11    | ENST00000368921.3 | myeloid/lymphoid or mixed-lineage leukemia (trithorax homolog, Drosopl | 308  | 2  | 1 | 0 | 1 | 0  | hsa-miR-3662 | -0.16 | -0.22 | N/A |
| METRNL    | ENST00000320095.7 | meteorin, glial cell differentiation regulator-like                    | 353  | 1  | 1 | 0 | 0 | 0  | hsa-miR-3662 | -0.1  | -0.22 | N/A |
| HRH4      | ENST00000256906.4 | histamine receptor H4                                                  | 5    | 2  | 0 | 1 | 1 | 2  | hsa-miR-3662 | -0.22 | -0.22 | N/A |

|            |                   |                                                                        |      |    |   |   |   |    |              |       |       |     |
|------------|-------------------|------------------------------------------------------------------------|------|----|---|---|---|----|--------------|-------|-------|-----|
| FGF5       | ENST00000456523.3 | fibroblast growth factor 5                                             | 1478 | 6  | 2 | 1 | 3 | 6  | hsa-miR-3662 | -0.1  | -0.22 | N/A |
| CDK13      | ENST00000181839.4 | cyclin-dependent kinase 13                                             | 32   | 5  | 1 | 2 | 2 | 3  | hsa-miR-3662 | -0.11 | -0.22 | N/A |
| CADM2      | ENST00000383699.3 | cell adhesion molecule 2                                               | 5    | 7  | 0 | 3 | 4 | 12 | hsa-miR-3662 | -0.22 | -0.22 | N/A |
| C21orf91   | ENST00000400558.3 | chromosome 21 open reading frame 91                                    | 998  | 7  | 3 | 1 | 3 | 4  | hsa-miR-3662 | -0.19 | -0.22 | N/A |
| BMPR2      | ENST00000374574.2 | bone morphogenetic protein receptor, type II (serine/threonine kinase) | 287  | 10 | 0 | 3 | 7 | 6  | hsa-miR-3662 | -0.06 | -0.22 | N/A |
| AC144568.2 | ENST00000522481.3 | Uncharacterized protein                                                | 5    | 1  | 1 | 0 | 0 | 0  | hsa-miR-3662 | -0.21 | -0.21 | N/A |
| AF165138.7 | ENST00000400562.1 | Protein LOC388813                                                      | 5    | 1  | 1 | 0 | 0 | 0  | hsa-miR-3662 | -0.21 | -0.21 | N/A |
| SLC9C2     | ENST00000367714.3 | solute carrier family 9, member C2 (putative)                          | 5    | 1  | 1 | 0 | 0 | 0  | hsa-miR-3662 | -0.21 | -0.21 | N/A |
| TRIM43     | ENST00000272395.2 | tripartite motif containing 43                                         | 5    | 1  | 1 | 0 | 0 | 1  | hsa-miR-3662 | -0.21 | -0.21 | N/A |
| RP11-664D7 | ENST00000512294.3 | HCG1787533; Uncharacterized protein                                    | 14   | 6  | 0 | 2 | 4 | 1  | hsa-miR-3662 | -0.15 | -0.21 | N/A |
| AC117395.1 | ENST00000593416.1 | LOC646903 protein; Uncharacterized protein                             | 22   | 3  | 2 | 1 | 0 | 0  | hsa-miR-3662 | -0.14 | -0.21 | N/A |
| RASSF9     | ENST00000361228.3 | Ras association (RalGDS/AF-6) domain family (N-terminal) member 9      | 9    | 6  | 2 | 2 | 2 | 6  | hsa-miR-3662 | -0.12 | -0.21 | N/A |
| TRAT1      | ENST00000295756.6 | T cell receptor associated transmembrane adaptor 1                     | 5    | 5  | 0 | 4 | 1 | 4  | hsa-miR-3662 | 0     | -0.21 | N/A |
| ZRANB2     | ENST00000254821.6 | zinc finger, RAN-binding domain containing 2                           | 4196 | 3  | 0 | 1 | 2 | 1  | hsa-miR-3662 | -0.11 | -0.21 | N/A |
| ZNF626     | ENST00000291750.6 | zinc finger protein 626                                                | 24   | 6  | 0 | 4 | 2 | 4  | hsa-miR-3662 | -0.1  | -0.21 | N/A |
| ZNF45      | ENST00000269973.5 | zinc finger protein 45                                                 | 359  | 6  | 0 | 4 | 2 | 4  | hsa-miR-3662 | -0.09 | -0.21 | N/A |
| UBE2E2     | ENST00000396703.1 | ubiquitin-conjugating enzyme E2E 2                                     | 794  | 4  | 3 | 1 | 0 | 1  | hsa-miR-3662 | -0.07 | -0.21 | N/A |
| SLC8A1     | ENST00000406785.2 | solute carrier family 8 (sodium/calcium exchanger), member 1           | 61   | 11 | 3 | 4 | 4 | 17 | hsa-miR-3662 | -0.08 | -0.21 | N/A |
| SHFM1      | ENST00000248566.2 | split hand/foot malformation (ectrodactyly) type 1                     | 96   | 1  | 1 | 0 | 0 | 0  | hsa-miR-3662 | -0.01 | -0.21 | N/A |
| RPS6KA6    | ENST00000262752.2 | ribosomal protein S6 kinase, 90kDa, polypeptide 6                      | 156  | 7  | 2 | 2 | 3 | 10 | hsa-miR-3662 | -0.1  | -0.21 | N/A |
| RNF152     | ENST00000312828.3 | ring finger protein 152                                                | 57   | 9  | 3 | 3 | 3 | 7  | hsa-miR-3662 | -0.13 | -0.21 | N/A |
| NAA38      | ENST00000249299.2 | N(alpha)-acetyltransferase 38, NatC auxiliary subunit                  | 458  | 6  | 1 | 0 | 5 | 8  | hsa-miR-3662 | -0.08 | -0.21 | N/A |
| ILF2       | ENST00000361891.4 | interleukin enhancer binding factor 2                                  | 5746 | 1  | 1 | 0 | 0 | 0  | hsa-miR-3662 | -0.01 | -0.21 | N/A |
| FAM227B    | ENST00000558594.1 | family with sequence similarity 227, member B                          | 44   | 3  | 1 | 2 | 0 | 3  | hsa-miR-3662 | -0.21 | -0.21 | N/A |
| ERBB4      | ENST00000342788.4 | v-erb-b2 avian erythroblastic leukemia viral oncogene homolog 4        | 27   | 6  | 0 | 5 | 1 | 7  | hsa-miR-3662 | -0.2  | -0.21 | N/A |
| ARL5A      | ENST00000295087.8 | ADP-ribosylation factor-like 5A                                        | 112  | 6  | 2 | 2 | 2 | 9  | hsa-miR-3662 | -0.05 | -0.21 | N/A |
| ALG10B     | ENST00000308742.4 | ALG10B, alpha-1,2-glucosyltransferase                                  | 471  | 9  | 0 | 5 | 4 | 6  | hsa-miR-3662 | -0.2  | -0.21 | N/A |
| POU1F1     | ENST00000350375.2 | POU class 1 homeobox 1                                                 | 5    | 1  | 1 | 0 | 0 | 0  | hsa-miR-3662 | -0.2  | -0.2  | N/A |
| TSHB       | ENST00000256592.1 | thyroid stimulating hormone, beta                                      | 5    | 1  | 0 | 1 | 0 | 0  | hsa-miR-3662 | -0.2  | -0.2  | N/A |
| C6orf211   | ENST00000367294.3 | chromosome 6 open reading frame 211                                    | 65   | 1  | 0 | 0 | 1 | 3  | hsa-miR-3662 | -0.15 | -0.2  | N/A |
| PGR        | ENST00000325455.5 | progesterone receptor                                                  | 8    | 8  | 5 | 1 | 2 | 10 | hsa-miR-3662 | -0.14 | -0.2  | N/A |
| EFHC2      | ENST00000420999.1 | EF-hand domain (C-terminal) containing 2                               | 5    | 1  | 0 | 1 | 0 | 3  | hsa-miR-3662 | -0.09 | -0.2  | N/A |
| WASF1      | ENST00000392587.2 | WAS protein family, member 1                                           | 55   | 1  | 1 | 0 | 0 | 0  | hsa-miR-3662 | -0.2  | -0.2  | N/A |
| TMPPE      | ENST00000416695.2 | transmembrane protein with metallophosphoesterase domain               | 22   | 9  | 2 | 5 | 2 | 6  | hsa-miR-3662 | -0.07 | -0.2  | N/A |
| SLC5A3     | ENST00000608209.1 | sodium/myo-inositol cotransporter                                      | 24   | 9  | 3 | 5 | 1 | 3  | hsa-miR-3662 | -0.12 | -0.2  | N/A |
| SLC16A7    | ENST00000261187.4 | solute carrier family 16 (monocarboxylate transporter), member 7       | 73   | 9  | 2 | 5 | 2 | 11 | hsa-miR-3662 | -0.06 | -0.2  | N/A |
| PRRG1      | ENST00000378628.4 | proline rich Gla (G-carboxyglutamic acid) 1                            | 1122 | 6  | 1 | 4 | 1 | 2  | hsa-miR-3662 | -0.2  | -0.2  | N/A |
| PDSS1      | ENST00000376203.5 | prenyl (decaprenyl) diphosphate synthase, subunit 1                    | 41   | 1  | 1 | 0 | 0 | 0  | hsa-miR-3662 | -0.2  | -0.2  | N/A |
| PAQR3      | ENST00000512733.1 | progesterin and adipoQ receptor family member III                      | 217  | 10 | 1 | 4 | 5 | 6  | hsa-miR-3662 | -0.12 | -0.2  | N/A |

|            |                   |                                                                  |       |    |   |   |   |    |              |       |       |     |
|------------|-------------------|------------------------------------------------------------------|-------|----|---|---|---|----|--------------|-------|-------|-----|
| LEPROT     | ENST00000371065.4 | leptin receptor overlapping transcript                           | 397   | 4  | 0 | 1 | 3 | 7  | hsa-miR-3662 | -0.06 | -0.2  | N/A |
| KLRC1      | ENST00000359151.3 | killer cell lectin-like receptor subfamily C, member 1           | 5     | 2  | 1 | 1 | 0 | 0  | hsa-miR-3662 | -0.2  | -0.2  | N/A |
| INO80D     | ENST00000403263.1 | INO80 complex subunit D                                          | 5     | 13 | 1 | 4 | 8 | 6  | hsa-miR-3662 | -0.2  | -0.2  | N/A |
| IL6        | ENST00000404625.1 | interleukin 6 (interferon, beta 2)                               | 472   | 2  | 0 | 0 | 2 | 0  | hsa-miR-3662 | -0.11 | -0.2  | N/A |
| IKZF5      | ENST00000368886.5 | IKAROS family zinc finger 5 (Pegasus)                            | 83    | 5  | 2 | 1 | 2 | 3  | hsa-miR-3662 | -0.09 | -0.2  | N/A |
| HIST1H3B   | ENST00000244661.2 | histone cluster 1, H3b                                           | 7     | 3  | 1 | 0 | 2 | 2  | hsa-miR-3662 | -0.04 | -0.2  | N/A |
| GUCY1A3    | ENST00000296518.7 | guanylate cyclase 1, soluble, alpha 3                            | 42    | 9  | 3 | 5 | 1 | 7  | hsa-miR-3662 | -0.05 | -0.2  | N/A |
| GIF        | ENST00000257248.2 | gastric intrinsic factor (vitamin B synthesis)                   | 5     | 1  | 1 | 0 | 0 | 0  | hsa-miR-3662 | -0.2  | -0.2  | N/A |
| FGG        | ENST00000404648.3 | fibrinogen gamma chain                                           | 488   | 3  | 2 | 1 | 0 | 0  | hsa-miR-3662 | -0.15 | -0.2  | N/A |
| CSTF2      | ENST00000415585.2 | cleavage stimulation factor, 3' pre-RNA, subunit 2, 64kDa        | 385   | 2  | 2 | 0 | 0 | 1  | hsa-miR-3662 | -0.17 | -0.2  | N/A |
| CENPK      | ENST00000514814.1 | centromere protein K                                             | 212   | 2  | 0 | 1 | 1 | 1  | hsa-miR-3662 | -0.19 | -0.2  | N/A |
| CCL16      | ENST00000293275.3 | chemokine (C-C motif) ligand 16                                  | 5     | 2  | 1 | 1 | 0 | 0  | hsa-miR-3662 | -0.2  | -0.2  | N/A |
| C6orf62    | ENST00000378119.4 | chromosome 6 open reading frame 62                               | 300   | 6  | 0 | 6 | 0 | 6  | hsa-miR-3662 | -0.12 | -0.2  | N/A |
| BAALC      | ENST00000438105.2 | brain and acute leukemia, cytoplasmic                            | 137   | 4  | 1 | 3 | 0 | 1  | hsa-miR-3662 | -0.14 | -0.2  | N/A |
| ATP6V1D    | ENST00000554236.1 | ATPase, H+ transporting, lysosomal 34kDa, V1 subunit D           | 1271  | 1  | 1 | 0 | 0 | 2  | hsa-miR-3662 | -0.2  | -0.2  | N/A |
| ANXA1      | ENST00000257497.6 | annexin A1                                                       | 365   | 2  | 0 | 1 | 1 | 1  | hsa-miR-3662 | -0.16 | -0.2  | N/A |
| AL441883.1 | ENST00000600057.1 | Uncharacterized protein                                          | 5     | 1  | 0 | 1 | 0 | 0  | hsa-miR-3662 | -0.19 | -0.19 | N/A |
| C10orf40   | ENST00000521074.1 | chromosome 10 open reading frame 40                              | 5     | 4  | 0 | 0 | 4 | 1  | hsa-miR-3662 | -0.19 | -0.19 | N/A |
| TMEM14E    | ENST00000408960.3 | transmembrane protein 14E                                        | 5     | 2  | 0 | 2 | 0 | 2  | hsa-miR-3662 | -0.19 | -0.19 | N/A |
| SLC6A5     | ENST00000525748.1 | solute carrier family 6 (neurotransmitter transporter), member 5 | 5     | 5  | 2 | 2 | 1 | 4  | hsa-miR-3662 | -0.19 | -0.19 | N/A |
| ZNF431     | ENST00000311048.7 | zinc finger protein 431                                          | 93    | 10 | 2 | 5 | 3 | 10 | hsa-miR-3662 | -0.11 | -0.19 | N/A |
| ZMAT3      | ENST00000311417.2 | zinc finger, matrin-type 3                                       | 459   | 10 | 1 | 7 | 2 | 9  | hsa-miR-3662 | -0.15 | -0.19 | N/A |
| TGFBR2     | ENST00000359013.4 | transforming growth factor, beta receptor II (70/80kDa)          | 2168  | 8  | 1 | 5 | 2 | 3  | hsa-miR-3662 | -0.03 | -0.19 | N/A |
| STPG2      | ENST00000295268.3 | sperm-tail PG-rich repeat containing 2                           | 5     | 1  | 1 | 0 | 0 | 0  | hsa-miR-3662 | -0.19 | -0.19 | N/A |
| SSR1       | ENST00000244763.4 | signal sequence receptor, alpha                                  | 12917 | 6  | 1 | 4 | 1 | 8  | hsa-miR-3662 | -0.04 | -0.19 | N/A |
| SIKE1      | ENST00000369528.5 | suppressor of IKBKE 1                                            | 281   | 7  | 1 | 3 | 3 | 5  | hsa-miR-3662 | -0.01 | -0.19 | N/A |
| RAP2B      | ENST00000323534.2 | RAP2B, member of RAS oncogene family                             | 594   | 8  | 3 | 5 | 0 | 7  | hsa-miR-3662 | -0.07 | -0.19 | N/A |
| PEX13      | ENST00000295030.5 | peroxisomal biogenesis factor 13                                 | 484   | 3  | 0 | 1 | 2 | 2  | hsa-miR-3662 | -0.06 | -0.19 | N/A |
| ONECUT2    | ENST00000491143.2 | one cut homeobox 2                                               | 847   | 5  | 0 | 2 | 3 | 11 | hsa-miR-3662 | -0.15 | -0.19 | N/A |
| NCOA7      | ENST00000392477.2 | nuclear receptor coactivator 7                                   | 2967  | 1  | 0 | 1 | 0 | 4  | hsa-miR-3662 | -0.19 | -0.19 | N/A |
| MED28      | ENST00000237380.7 | mediator complex subunit 28                                      | 1483  | 5  | 2 | 3 | 0 | 9  | hsa-miR-3662 | -0.11 | -0.19 | N/A |
| LNPEP      | ENST00000231368.5 | leucyl/cystinyl aminopeptidase                                   | 28    | 10 | 2 | 5 | 3 | 7  | hsa-miR-3662 | -0.05 | -0.19 | N/A |
| KRTAP4-8   | ENST00000333822.4 | keratin associated protein 4-8                                   | 5     | 3  | 1 | 2 | 0 | 0  | hsa-miR-3662 | -0.19 | -0.19 | N/A |
| IMPACT     | ENST00000284202.4 | impact RWD domain protein                                        | 250   | 1  | 1 | 0 | 0 | 2  | hsa-miR-3662 | -0.15 | -0.19 | N/A |
| GPR63      | ENST00000229955.3 | G protein-coupled receptor 63                                    | 5     | 6  | 1 | 2 | 3 | 6  | hsa-miR-3662 | -0.19 | -0.19 | N/A |
| FRG2B      | ENST00000443774.1 | FSHD region gene 2 family, member B                              | 5     | 2  | 2 | 0 | 0 | 0  | hsa-miR-3662 | -0.19 | -0.19 | N/A |
| FRG2       | ENST00000504750.1 | FSHD region gene 2                                               | 5     | 2  | 2 | 0 | 0 | 0  | hsa-miR-3662 | -0.19 | -0.19 | N/A |
| FKBP1A     | ENST00000400137.4 | FK506 binding protein 1A, 12kDa                                  | 72    | 2  | 1 | 1 | 0 | 0  | hsa-miR-3662 | -0.19 | -0.19 | N/A |
| EFCAB7     | ENST00000371088.4 | EF-hand calcium binding domain 7                                 | 113   | 1  | 1 | 0 | 0 | 1  | hsa-miR-3662 | -0.19 | -0.19 | N/A |

|          |                   |                                                                              |      |    |   |   |   |   |              |       |       |     |
|----------|-------------------|------------------------------------------------------------------------------|------|----|---|---|---|---|--------------|-------|-------|-----|
| DPP4     | ENST00000360534.3 | dipeptidyl-peptidase 4                                                       | 49   | 3  | 1 | 2 | 0 | 0 | hsa-miR-3662 | -0.19 | -0.19 | N/A |
| DNAJC2   | ENST00000249270.7 | DnaJ (Hsp40) homolog, subfamily C, member 2                                  | 221  | 1  | 0 | 1 | 0 | 2 | hsa-miR-3662 | -0.06 | -0.19 | N/A |
| CREBZF   | ENST00000398294.2 | CREB/ATF bZIP transcription factor                                           | 1115 | 10 | 2 | 5 | 3 | 4 | hsa-miR-3662 | -0.12 | -0.19 | N/A |
| CHMP1B   | ENST00000526991.2 | charged multivesicular body protein 1B                                       | 3248 | 1  | 1 | 0 | 0 | 1 | hsa-miR-3662 | -0.05 | -0.19 | N/A |
| C2ORF15  | ENST00000302513.2 | Uncharacterized protein C2orf15                                              | 166  | 5  | 2 | 0 | 3 | 7 | hsa-miR-3662 | -0.15 | -0.19 | N/A |
| BMP3     | ENST00000282701.2 | bone morphogenetic protein 3                                                 | 36   | 5  | 2 | 2 | 1 | 6 | hsa-miR-3662 | -0.09 | -0.19 | N/A |
| ABCD2    | ENST00000308666.3 | ATP-binding cassette, sub-family D (ALD), member 2                           | 5    | 3  | 1 | 1 | 1 | 5 | hsa-miR-3662 | -0.1  | -0.19 | N/A |
| AAED1    | ENST00000375234.3 | AhpC/TSA antioxidant enzyme domain containing 1                              | 5    | 3  | 0 | 1 | 2 | 1 | hsa-miR-3662 | -0.19 | -0.19 | N/A |
| KRBOX1   | ENST00000426937.1 | KRAB box domain containing 1                                                 | 28   | 1  | 0 | 1 | 0 | 1 | hsa-miR-3662 | -0.18 | -0.18 | N/A |
| GABRA4   | ENST00000264318.3 | gamma-aminobutyric acid (GABA) A receptor, alpha 4                           | 5    | 10 | 1 | 6 | 3 | 2 | hsa-miR-3662 | -0.18 | -0.18 | N/A |
| FRG2C    | ENST00000308062.3 | FSHD region gene 2 family, member C                                          | 7    | 2  | 2 | 0 | 0 | 1 | hsa-miR-3662 | -0.18 | -0.18 | N/A |
| GPR174   | ENST00000276077.1 | G protein-coupled receptor 174                                               | 5    | 5  | 1 | 3 | 1 | 1 | hsa-miR-3662 | 0     | -0.18 | N/A |
| ZNF148   | ENST00000360647.4 | zinc finger protein 148                                                      | 230  | 11 | 1 | 4 | 6 | 2 | hsa-miR-3662 | -0.12 | -0.18 | N/A |
| ZNF117   | ENST00000282869.6 | zinc finger protein 117                                                      | 21   | 9  | 2 | 5 | 2 | 7 | hsa-miR-3662 | -0.11 | -0.18 | N/A |
| UBA3     | ENST00000415609.2 | ubiquitin-like modifier activating enzyme 3                                  | 96   | 2  | 0 | 1 | 1 | 1 | hsa-miR-3662 | -0.12 | -0.18 | N/A |
| TMOD3    | ENST00000308580.7 | tropomodulin 3 (ubiquitous)                                                  | 1533 | 3  | 1 | 0 | 2 | 3 | hsa-miR-3662 | -0.13 | -0.18 | N/A |
| SYNCRIP  | ENST00000355238.6 | synaptotagmin binding, cytoplasmic RNA interacting protein                   | 4864 | 3  | 1 | 2 | 0 | 3 | hsa-miR-3662 | -0.06 | -0.18 | N/A |
| SPHAR    | ENST00000366688.3 | S-phase response (cyclin related)                                            | 202  | 2  | 1 | 1 | 0 | 2 | hsa-miR-3662 | 0     | -0.18 | N/A |
| SLC30A7  | ENST00000370112.4 | solute carrier family 30 (zinc transporter), member 7                        | 204  | 11 | 3 | 1 | 7 | 7 | hsa-miR-3662 | -0.07 | -0.18 | N/A |
| SDHC     | ENST00000367975.2 | succinate dehydrogenase complex, subunit C, integral membrane protei         | 172  | 2  | 1 | 0 | 1 | 0 | hsa-miR-3662 | -0.17 | -0.18 | N/A |
| RNF170   | ENST00000534961.1 | ring finger protein 170                                                      | 203  | 5  | 1 | 1 | 3 | 0 | hsa-miR-3662 | -0.01 | -0.18 | N/A |
| RCHY1    | ENST00000451788.1 | ring finger and CHY zinc finger domain containing 1, E3 ubiquitin protei     | 821  | 3  | 0 | 2 | 1 | 2 | hsa-miR-3662 | -0.05 | -0.18 | N/A |
| PRKACB   | ENST00000370689.2 | protein kinase, cAMP-dependent, catalytic, beta                              | 344  | 6  | 3 | 0 | 3 | 1 | hsa-miR-3662 | -0.05 | -0.18 | N/A |
| PLCL1    | ENST00000428675.1 | phospholipase C-like 1                                                       | 31   | 6  | 0 | 4 | 2 | 7 | hsa-miR-3662 | -0.09 | -0.18 | N/A |
| OGFRL1   | ENST00000370435.4 | opioid growth factor receptor-like 1                                         | 607  | 8  | 3 | 4 | 1 | 7 | hsa-miR-3662 | -0.02 | -0.18 | N/A |
| NSL1     | ENST00000422588.2 | NSL1, MIS12 kinetochore complex component                                    | 180  | 4  | 0 | 3 | 1 | 8 | hsa-miR-3662 | -0.05 | -0.18 | N/A |
| NFIL3    | ENST00000297689.3 | nuclear factor, interleukin 3 regulated                                      | 7439 | 2  | 0 | 0 | 2 | 1 | hsa-miR-3662 | 0     | -0.18 | N/A |
| NFAT5    | ENST00000354436.2 | nuclear factor of activated T-cells 5, tonicity-responsive                   | 128  | 8  | 2 | 5 | 1 | 8 | hsa-miR-3662 | -0.08 | -0.18 | N/A |
| NDUFAF4  | ENST00000316149.7 | NADH dehydrogenase (ubiquinone) complex I, assembly factor 4                 | 2444 | 3  | 0 | 1 | 2 | 1 | hsa-miR-3662 | -0.16 | -0.18 | N/A |
| LCOR     | ENST00000371103.3 | ligand dependent nuclear receptor corepressor                                | 94   | 7  | 2 | 2 | 3 | 6 | hsa-miR-3662 | -0.18 | -0.18 | N/A |
| HLA-DRA  | ENST00000395388.2 | major histocompatibility complex, class II, DR alpha                         | 58   | 1  | 1 | 0 | 0 | 1 | hsa-miR-3662 | -0.18 | -0.18 | N/A |
| HIF1A    | ENST00000323441.6 | hypoxia inducible factor 1, alpha subunit (basic helix-loop-helix transcript | 1955 | 8  | 1 | 3 | 4 | 0 | hsa-miR-3662 | -0.06 | -0.18 | N/A |
| GRIN2B   | ENST00000609686.1 | glutamate receptor, ionotropic, N-methyl D-aspartate 2B                      | 5    | 12 | 1 | 4 | 7 | 7 | hsa-miR-3662 | -0.18 | -0.18 | N/A |
| GNG10    | ENST00000374293.4 | guanine nucleotide binding protein (G protein), gamma 10                     | 407  | 2  | 0 | 1 | 1 | 0 | hsa-miR-3662 | -0.18 | -0.18 | N/A |
| GLIPR2   | ENST00000396613.3 | GLI pathogenesis-related 2                                                   | 218  | 2  | 1 | 0 | 1 | 0 | hsa-miR-3662 | -0.09 | -0.18 | N/A |
| EXOC8    | ENST00000360394.2 | exocyst complex component 8                                                  | 129  | 9  | 2 | 5 | 2 | 5 | hsa-miR-3662 | -0.05 | -0.18 | N/A |
| ERICH2   | ENST00000409885.1 | glutamate-rich 2                                                             | 13   | 1  | 0 | 0 | 1 | 0 | hsa-miR-3662 | -0.11 | -0.18 | N/A |
| C4orf36  | ENST00000473559.1 | chromosome 4 open reading frame 36                                           | 5    | 3  | 1 | 2 | 0 | 2 | hsa-miR-3662 | -0.18 | -0.18 | N/A |
| C12orf50 | ENST00000298699.2 | chromosome 12 open reading frame 50                                          | 5    | 1  | 0 | 0 | 1 | 0 | hsa-miR-3662 | -0.18 | -0.18 | N/A |

|             |                   |                                                                        |       |    |   |   |   |    |              |       |       |     |
|-------------|-------------------|------------------------------------------------------------------------|-------|----|---|---|---|----|--------------|-------|-------|-----|
| BRWD3       | ENST00000373275.4 | bromodomain and WD repeat domain containing 3                          | 506   | 9  | 3 | 1 | 5 | 10 | hsa-miR-3662 | -0.12 | -0.18 | N/A |
| RP11-1102P1 | ENST00000523987.1 | Uncharacterized protein                                                | 5     | 2  | 0 | 1 | 1 | 3  | hsa-miR-3662 | -0.17 | -0.17 | N/A |
| PRAMEF14    | ENST00000344998.3 | PRAME family member 14                                                 | 5     | 2  | 0 | 2 | 0 | 0  | hsa-miR-3662 | -0.17 | -0.17 | N/A |
| AC107021.1  | ENST00000422482.1 | HCG1786590; PRO2533; Uncharacterized protein                           | 5     | 1  | 1 | 0 | 0 | 0  | hsa-miR-3662 | -0.17 | -0.17 | N/A |
| MANSC4      | ENST00000381273.3 | MANSC domain containing 4                                              | 0     | 1  | 0 | 1 | 0 | 0  | hsa-miR-3662 | -0.17 | -0.17 | N/A |
| ZKSCAN8     | ENST00000330236.6 | zinc finger with KRAB and SCAN domains 8                               | 281   | 8  | 2 | 5 | 1 | 7  | hsa-miR-3662 | -0.17 | -0.17 | N/A |
| XRCC5       | ENST00000392133.3 | X-ray repair complementing defective repair in Chinese hamster cells 5 | 14802 | 11 | 2 | 2 | 7 | 4  | hsa-miR-3662 | 0     | -0.17 | N/A |
| TOMM6       | ENST00000398884.3 | translocase of outer mitochondrial membrane 6 homolog (yeast)          | 2735  | 3  | 2 | 0 | 1 | 1  | hsa-miR-3662 | 0     | -0.17 | N/A |
| TNRC6B      | ENST00000335727.9 | trinucleotide repeat containing 6B                                     | 69    | 10 | 1 | 5 | 4 | 9  | hsa-miR-3662 | -0.13 | -0.17 | N/A |
| TMEM100     | ENST00000424486.2 | transmembrane protein 100                                              | 86    | 1  | 1 | 0 | 0 | 1  | hsa-miR-3662 | -0.17 | -0.17 | N/A |
| TMC1        | ENST00000297784.5 | transmembrane channel-like 1                                           | 5     | 1  | 1 | 0 | 0 | 0  | hsa-miR-3662 | -0.17 | -0.17 | N/A |
| THEMIS2     | ENST00000373925.1 | thymocyte selection associated family member 2                         | 41    | 2  | 1 | 0 | 1 | 0  | hsa-miR-3662 | -0.17 | -0.17 | N/A |
| TFEC        | ENST00000265440.7 | transcription factor EC                                                | 5     | 5  | 2 | 3 | 0 | 2  | hsa-miR-3662 | -0.17 | -0.17 | N/A |
| SRSF10      | ENST00000343255.5 | serine/arginine-rich splicing factor 10                                | 1920  | 9  | 2 | 4 | 3 | 3  | hsa-miR-3662 | -0.13 | -0.17 | N/A |
| SPCS3       | ENST00000503362.1 | signal peptidase complex subunit 3 homolog (S. cerevisiae)             | 1645  | 4  | 1 | 1 | 2 | 2  | hsa-miR-3662 | -0.08 | -0.17 | N/A |
| SOX30       | ENST00000265007.6 | SRY (sex determining region Y)-box 30                                  | 5     | 3  | 1 | 1 | 1 | 3  | hsa-miR-3662 | -0.14 | -0.17 | N/A |
| SOGA3       | ENST00000556132.1 | SOGA family member 3                                                   | 95    | 7  | 2 | 4 | 1 | 4  | hsa-miR-3662 | -0.03 | -0.17 | N/A |
| PUS10       | ENST00000398658.2 | pseudouridylate synthase 10                                            | 72    | 1  | 1 | 0 | 0 | 1  | hsa-miR-3662 | -0.17 | -0.17 | N/A |
| PCDH17      | ENST00000377918.3 | protocadherin 17                                                       | 477   | 9  | 2 | 2 | 5 | 7  | hsa-miR-3662 | -0.03 | -0.17 | N/A |
| MBNL3       | ENST00000370839.3 | muscleblind-like splicing regulator 3                                  | 593   | 11 | 2 | 2 | 7 | 4  | hsa-miR-3662 | -0.12 | -0.17 | N/A |
| LRIG2       | ENST00000361127.5 | leucine-rich repeats and immunoglobulin-like domains 2                 | 348   | 7  | 3 | 4 | 0 | 2  | hsa-miR-3662 | -0.16 | -0.17 | N/A |
| LPP         | ENST00000312675.4 | LIM domain containing preferred translocation partner in lipoma        | 1894  | 5  | 0 | 2 | 3 | 12 | hsa-miR-3662 | -0.17 | -0.17 | N/A |
| LIN7A       | ENST00000552864.1 | lin-7 homolog A (C. elegans)                                           | 86    | 6  | 0 | 4 | 2 | 4  | hsa-miR-3662 | -0.07 | -0.17 | N/A |
| INTS6       | ENST00000311234.4 | integrator complex subunit 6                                           | 433   | 6  | 1 | 5 | 0 | 6  | hsa-miR-3662 | -0.11 | -0.17 | N/A |
| IMPAD1      | ENST00000262644.4 | inositol monophosphatase domain containing 1                           | 1488  | 8  | 1 | 7 | 0 | 3  | hsa-miR-3662 | -0.07 | -0.17 | N/A |
| IL36G       | ENST00000259205.4 | interleukin 36, gamma                                                  | 5     | 3  | 1 | 2 | 0 | 1  | hsa-miR-3662 | -0.17 | -0.17 | N/A |
| IL1A        | ENST00000263339.3 | interleukin 1, alpha                                                   | 5     | 3  | 1 | 2 | 0 | 1  | hsa-miR-3662 | -0.17 | -0.17 | N/A |
| HSPH1       | ENST00000320027.5 | heat shock 105kDa/110kDa protein 1                                     | 4109  | 4  | 1 | 2 | 1 | 2  | hsa-miR-3662 | 0     | -0.17 | N/A |
| HEXIM1      | ENST00000332499.2 | hexamethylene bis-acetamide inducible 1                                | 179   | 2  | 1 | 1 | 0 | 3  | hsa-miR-3662 | -0.13 | -0.17 | N/A |
| HBP1        | ENST00000222574.4 | HMG-box transcription factor 1                                         | 167   | 1  | 0 | 0 | 1 | 0  | hsa-miR-3662 | -0.17 | -0.17 | N/A |
| GUCY1B3     | ENST00000264424.8 | guanylate cyclase 1, soluble, beta 3                                   | 729   | 2  | 0 | 2 | 0 | 0  | hsa-miR-3662 | -0.02 | -0.17 | N/A |
| GTPBP10     | ENST00000222511.6 | GTP-binding protein 10 (putative)                                      | 489   | 10 | 0 | 7 | 3 | 2  | hsa-miR-3662 | -0.01 | -0.17 | N/A |
| GPR180      | ENST00000376958.4 | G protein-coupled receptor 180                                         | 161   | 5  | 0 | 3 | 2 | 5  | hsa-miR-3662 | -0.07 | -0.17 | N/A |
| FGFR1OP     | ENST00000366847.4 | FGFR1 oncogene partner                                                 | 552   | 9  | 2 | 3 | 4 | 3  | hsa-miR-3662 | -0.06 | -0.17 | N/A |
| FAM229A     | ENST00000432622.1 | family with sequence similarity 229, member A                          | 59    | 2  | 0 | 0 | 2 | 0  | hsa-miR-3662 | -0.17 | -0.17 | N/A |
| DNAJB4      | ENST00000370763.5 | DnaJ (Hsp40) homolog, subfamily B, member 4                            | 633   | 7  | 1 | 1 | 5 | 6  | hsa-miR-3662 | -0.02 | -0.17 | N/A |
| DGKI        | ENST00000453654.2 | diacylglycerol kinase, iota                                            | 16    | 10 | 1 | 5 | 4 | 7  | hsa-miR-3662 | -0.05 | -0.17 | N/A |
| COL4A4      | ENST00000396625.3 | collagen, type IV, alpha 4                                             | 133   | 7  | 1 | 4 | 2 | 4  | hsa-miR-3662 | -0.15 | -0.17 | N/A |
| COL19A1     | ENST00000322773.4 | collagen, type XIX, alpha 1                                            | 5     | 9  | 2 | 4 | 3 | 6  | hsa-miR-3662 | -0.13 | -0.17 | N/A |



|            |                   |                                                                             |       |    |   |   |   |    |              |       |       |     |
|------------|-------------------|-----------------------------------------------------------------------------|-------|----|---|---|---|----|--------------|-------|-------|-----|
| CELF2      | ENST00000379261.4 | CUGBP, Elav-like family member 2                                            | 45    | 8  | 2 | 5 | 1 | 4  | hsa-miR-3662 | -0.17 | -0.17 | N/A |
| CCT7       | ENST00000540468.1 | chaperonin containing TCP1, subunit 7 (eta)                                 | 13211 | 1  | 1 | 0 | 0 | 0  | hsa-miR-3662 | -0.17 | -0.17 | N/A |
| CALCRL     | ENST00000392370.3 | calcitonin receptor-like                                                    | 18    | 8  | 3 | 3 | 2 | 1  | hsa-miR-3662 | -0.07 | -0.17 | N/A |
| C1QBP      | ENST00000225698.4 | complement component 1, q subcomponent binding protein                      | 2957  | 1  | 0 | 1 | 0 | 0  | hsa-miR-3662 | -0.16 | -0.17 | N/A |
| C18orf32   | ENST00000579820.1 | chromosome 18 open reading frame 32                                         | 733   | 5  | 0 | 3 | 2 | 0  | hsa-miR-3662 | 0     | -0.17 | N/A |
| AQR        | ENST00000156471.5 | aquarius intron-binding spliceosomal factor                                 | 314   | 4  | 1 | 1 | 2 | 6  | hsa-miR-3662 | -0.04 | -0.17 | N/A |
| ALDH3A2    | ENST00000339618.4 | aldehyde dehydrogenase 3 family, member A2                                  | 940   | 2  | 2 | 0 | 0 | 0  | hsa-miR-3662 | -0.02 | -0.17 | N/A |
| ADHFE1     | ENST00000396623.3 | alcohol dehydrogenase, iron containing, 1                                   | 33    | 4  | 1 | 2 | 1 | 0  | hsa-miR-3662 | -0.01 | -0.17 | N/A |
| AC006455.1 | ENST00000456890.1 |                                                                             | 5     | 1  | 1 | 0 | 0 | 1  | hsa-miR-3662 | -0.16 | -0.16 | N/A |
| PRAMEF13   | ENST00000376132.3 | PRAME family member 13                                                      | 5     | 2  | 0 | 2 | 0 | 0  | hsa-miR-3662 | -0.16 | -0.16 | N/A |
| KRTAP20-2  | ENST00000330798.2 | keratin associated protein 20-2                                             | 45    | 1  | 0 | 1 | 0 | 0  | hsa-miR-3662 | -0.16 | -0.16 | N/A |
| GAGE1      | ENST00000381700.6 | G antigen 1                                                                 | 5     | 3  | 0 | 2 | 1 | 1  | hsa-miR-3662 | -0.13 | -0.16 | N/A |
| C4orf40    | ENST00000344526.5 | chromosome 4 open reading frame 40                                          | 5     | 3  | 0 | 1 | 2 | 3  | hsa-miR-3662 | 0     | -0.16 | N/A |
| ZADH2      | ENST00000322342.3 | zinc binding alcohol dehydrogenase domain containing 2                      | 207   | 8  | 3 | 2 | 3 | 1  | hsa-miR-3662 | -0.05 | -0.16 | N/A |
| XRCC4      | ENST00000511817.1 | X-ray repair complementing defective repair in Chinese hamster cells 4      | 573   | 2  | 1 | 0 | 1 | 0  | hsa-miR-3662 | -0.16 | -0.16 | N/A |
| WDFY2      | ENST00000298125.5 | WD repeat and FYVE domain containing 2                                      | 85    | 9  | 2 | 3 | 4 | 3  | hsa-miR-3662 | -0.03 | -0.16 | N/A |
| TTLL7      | ENST00000260505.8 | tubulin tyrosine ligase-like family, member 7                               | 93    | 8  | 2 | 4 | 2 | 3  | hsa-miR-3662 | -0.14 | -0.16 | N/A |
| TMEM69     | ENST00000372025.4 | transmembrane protein 69                                                    | 20    | 1  | 1 | 0 | 0 | 1  | hsa-miR-3662 | -0.16 | -0.16 | N/A |
| TMEM241    | ENST00000383233.3 | transmembrane protein 241                                                   | 115   | 8  | 1 | 6 | 1 | 0  | hsa-miR-3662 | -0.11 | -0.16 | N/A |
| TMEM135    | ENST00000340353.7 | transmembrane protein 135                                                   | 963   | 7  | 0 | 5 | 2 | 6  | hsa-miR-3662 | -0.03 | -0.16 | N/A |
| TLR4       | ENST00000355622.6 | toll-like receptor 4                                                        | 47    | 8  | 2 | 4 | 2 | 7  | hsa-miR-3662 | -0.03 | -0.16 | N/A |
| TAOK1      | ENST00000261716.3 | TAO kinase 1                                                                | 164   | 10 | 2 | 2 | 6 | 8  | hsa-miR-3662 | -0.14 | -0.16 | N/A |
| SLC30A4    | ENST00000261867.4 | solute carrier family 30 (zinc transporter), member 4                       | 19    | 8  | 2 | 4 | 2 | 1  | hsa-miR-3662 | -0.11 | -0.16 | N/A |
| SLC1A2     | ENST00000278379.3 | solute carrier family 1 (glial high affinity glutamate transporter), member | 5     | 8  | 1 | 6 | 1 | 7  | hsa-miR-3662 | -0.16 | -0.16 | N/A |
| SH2D1B     | ENST00000367929.2 | SH2 domain containing 1B                                                    | 5     | 2  | 0 | 0 | 2 | 1  | hsa-miR-3662 | -0.16 | -0.16 | N/A |
| SGIP1      | ENST00000371036.3 | SH3-domain GRB2-like (endophilin) interacting protein 1                     | 180   | 7  | 3 | 3 | 1 | 6  | hsa-miR-3662 | -0.03 | -0.16 | N/A |
| SERINC1    | ENST00000339697.4 | serine incorporator 1                                                       | 2408  | 8  | 1 | 6 | 1 | 4  | hsa-miR-3662 | -0.02 | -0.16 | N/A |
| RLIM       | ENST00000332687.6 | ring finger protein, LIM domain interacting                                 | 662   | 8  | 3 | 2 | 3 | 1  | hsa-miR-3662 | -0.08 | -0.16 | N/A |
| RFT1       | ENST00000296292.3 | RFT1 homolog (S. cerevisiae)                                                | 392   | 2  | 1 | 1 | 0 | 2  | hsa-miR-3662 | -0.13 | -0.16 | N/A |
| RDX        | ENST00000343115.4 | radixin                                                                     | 44    | 9  | 2 | 3 | 4 | 9  | hsa-miR-3662 | -0.09 | -0.16 | N/A |
| RBM7       | ENST00000541475.1 | RNA binding motif protein 7                                                 | 46    | 7  | 3 | 3 | 1 | 4  | hsa-miR-3662 | -0.14 | -0.16 | N/A |
| PRAMEF1    | ENST00000332296.7 | PRAME family member 1                                                       | 5     | 2  | 0 | 2 | 0 | 0  | hsa-miR-3662 | -0.16 | -0.16 | N/A |
| PPIP5K2    | ENST00000321521.9 | diphosphoinositol pentakisphosphate kinase 2                                | 203   | 8  | 2 | 4 | 2 | 10 | hsa-miR-3662 | -0.01 | -0.16 | N/A |
| PDK3       | ENST00000441463.2 | pyruvate dehydrogenase kinase, isozyme 3                                    | 659   | 8  | 2 | 4 | 2 | 5  | hsa-miR-3662 | -0.09 | -0.16 | N/A |
| NFYC       | ENST00000447388.3 | nuclear transcription factor Y, gamma                                       | 777   | 1  | 1 | 0 | 0 | 2  | hsa-miR-3662 | -0.11 | -0.16 | N/A |
| NDUFB1     | ENST00000553514.1 | NADH dehydrogenase (ubiquinone) 1 beta subcomplex, 1, 7kDa                  | 534   | 1  | 0 | 0 | 1 | 0  | hsa-miR-3662 | -0.16 | -0.16 | N/A |
| NAA30      | ENST00000556492.1 | N(alpha)-acetyltransferase 30, NatC catalytic subunit                       | 418   | 8  | 1 | 3 | 4 | 6  | hsa-miR-3662 | -0.06 | -0.16 | N/A |
| MTAP       | ENST00000380172.4 | methylthioadenosine phosphorylase                                           | 1575  | 8  | 0 | 5 | 3 | 5  | hsa-miR-3662 | -0.06 | -0.16 | N/A |
| MPHOSPH6   | ENST00000258169.4 | M-phase phosphoprotein 6                                                    | 139   | 1  | 1 | 0 | 0 | 0  | hsa-miR-3662 | -0.16 | -0.16 | N/A |

|          |                   |                                                                              |       |    |   |   |   |   |              |       |       |     |
|----------|-------------------|------------------------------------------------------------------------------|-------|----|---|---|---|---|--------------|-------|-------|-----|
| LSM3     | ENST00000306024.3 | LSM3 homolog, U6 small nuclear RNA associated ( <i>S. cerevisiae</i> )       | 304   | 2  | 0 | 2 | 0 | 3 | hsa-miR-3662 | -0.13 | -0.16 | N/A |
| KCTD16   | ENST00000507359.3 | potassium channel tetramerization domain containing 16                       | 36    | 9  | 1 | 5 | 3 | 5 | hsa-miR-3662 | -0.07 | -0.16 | N/A |
| GRSF1    | ENST00000254799.6 | G-rich RNA sequence binding factor 1                                         | 4414  | 5  | 2 | 1 | 2 | 2 | hsa-miR-3662 | 0     | -0.16 | N/A |
| GABPA    | ENST00000354828.3 | GA binding protein transcription factor, alpha subunit 60kDa                 | 8     | 6  | 4 | 2 | 0 | 2 | hsa-miR-3662 | -0.14 | -0.16 | N/A |
| FER      | ENST00000281092.4 | fer ( <i>fps/fes</i> related) tyrosine kinase                                | 665   | 8  | 1 | 6 | 1 | 3 | hsa-miR-3662 | -0.16 | -0.16 | N/A |
| EIF4E3   | ENST00000425534.3 | eukaryotic translation initiation factor 4E family member 3                  | 475   | 8  | 2 | 2 | 4 | 7 | hsa-miR-3662 | -0.01 | -0.16 | N/A |
| EFCAB2   | ENST00000366523.1 | EF-hand calcium binding domain 2                                             | 204   | 5  | 1 | 2 | 2 | 1 | hsa-miR-3662 | -0.09 | -0.16 | N/A |
| CPEB4    | ENST00000265085.5 | cytoplasmic polyadenylation element binding protein 4                        | 472   | 10 | 0 | 6 | 4 | 5 | hsa-miR-3662 | -0.15 | -0.16 | N/A |
| CFHR1    | ENST00000320493.5 | complement factor H-related 1                                                | 5     | 1  | 0 | 1 | 0 | 0 | hsa-miR-3662 | -0.16 | -0.16 | N/A |
| C6orf48  | ENST00000375633.1 | chromosome 6 open reading frame 48                                           | 5498  | 1  | 0 | 0 | 1 | 0 | hsa-miR-3662 | -0.16 | -0.16 | N/A |
| APOLD1   | ENST00000356591.4 | apolipoprotein L domain containing 1                                         | 27    | 7  | 3 | 3 | 1 | 4 | hsa-miR-3662 | -0.12 | -0.16 | N/A |
| ANKRD49  | ENST00000544253.1 | ankyrin repeat domain 49                                                     | 32    | 7  | 3 | 2 | 2 | 1 | hsa-miR-3662 | -0.14 | -0.16 | N/A |
| TMSB15A  | ENST00000289373.4 | thymosin beta 15a                                                            | 14    | 1  | 0 | 1 | 0 | 0 | hsa-miR-3662 | -0.15 | -0.15 | N/A |
| FUT9     | ENST00000302103.5 | fucosyltransferase 9 (alpha (1,3) fucosyltransferase)                        | 5     | 5  | 0 | 3 | 2 | 6 | hsa-miR-3662 | -0.15 | -0.15 | N/A |
| C1orf141 | ENST00000371007.2 | chromosome 1 open reading frame 141                                          | 5     | 1  | 0 | 0 | 1 | 2 | hsa-miR-3662 | -0.15 | -0.15 | N/A |
| AFF2     | ENST00000370460.2 | AF4/FMR2 family, member 2                                                    | 8     | 8  | 1 | 5 | 2 | 3 | hsa-miR-3662 | -0.1  | -0.15 | N/A |
| KIAA0408 | ENST00000483725.3 | KIAA0408                                                                     | 95    | 7  | 2 | 4 | 1 | 4 | hsa-miR-3662 | -0.02 | -0.15 | N/A |
| ZNF708   | ENST00000356929.3 | zinc finger protein 708                                                      | 16    | 10 | 0 | 5 | 5 | 7 | hsa-miR-3662 | -0.03 | -0.15 | N/A |
| ZNF704   | ENST00000327835.3 | zinc finger protein 704                                                      | 124   | 5  | 1 | 3 | 1 | 8 | hsa-miR-3662 | -0.08 | -0.15 | N/A |
| ZMYM1    | ENST00000373330.1 | zinc finger, MYM-type 1                                                      | 215   | 7  | 1 | 6 | 0 | 2 | hsa-miR-3662 | -0.12 | -0.15 | N/A |
| ZDHHC3   | ENST00000296127.3 | zinc finger, DHHC-type containing 3                                          | 426   | 10 | 1 | 3 | 6 | 6 | hsa-miR-3662 | -0.07 | -0.15 | N/A |
| USP44    | ENST00000552440.1 | ubiquitin specific peptidase 44                                              | 29    | 5  | 2 | 1 | 2 | 0 | hsa-miR-3662 | -0.12 | -0.15 | N/A |
| USP15    | ENST00000353364.3 | ubiquitin specific peptidase 15                                              | 286   | 6  | 3 | 3 | 0 | 8 | hsa-miR-3662 | -0.01 | -0.15 | N/A |
| UFL1     | ENST00000369278.4 | UFM1-specific ligase 1                                                       | 298   | 5  | 0 | 1 | 4 | 3 | hsa-miR-3662 | -0.11 | -0.15 | N/A |
| TVP23B   | ENST00000307767.8 | trans-golgi network vesicle protein 23 homolog B ( <i>S. cerevisiae</i> )    | 5     | 2  | 0 | 0 | 2 | 1 | hsa-miR-3662 | -0.06 | -0.15 | N/A |
| TOP3B    | ENST00000357179.5 | topoisomerase (DNA) III beta                                                 | 5     | 1  | 0 | 0 | 1 | 0 | hsa-miR-3662 | -0.15 | -0.15 | N/A |
| SOX6     | ENST00000316399.6 | SRY (sex determining region Y)-box 6                                         | 22    | 7  | 2 | 4 | 1 | 3 | hsa-miR-3662 | -0.05 | -0.15 | N/A |
| SNX24    | ENST00000513881.1 | sorting nexin 24                                                             | 352   | 3  | 1 | 0 | 2 | 2 | hsa-miR-3662 | -0.12 | -0.15 | N/A |
| SLC7A11  | ENST00000280612.5 | solute carrier family 7 (anionic amino acid transporter light chain, xc- sys | 61    | 10 | 0 | 5 | 5 | 3 | hsa-miR-3662 | -0.05 | -0.15 | N/A |
| SH3D19   | ENST00000409598.4 | SH3 domain containing 19                                                     | 245   | 8  | 1 | 5 | 2 | 2 | hsa-miR-3662 | -0.05 | -0.15 | N/A |
| RPAP2    | ENST00000610020.1 | RNA polymerase II associated protein 2                                       | 222   | 6  | 3 | 3 | 0 | 7 | hsa-miR-3662 | 0     | -0.15 | N/A |
| RORA     | ENST00000335670.6 | RAR-related orphan receptor A                                                | 102   | 7  | 1 | 6 | 0 | 8 | hsa-miR-3662 | -0.13 | -0.15 | N/A |
| REEP3    | ENST00000373758.4 | receptor accessory protein 3                                                 | 1095  | 6  | 2 | 1 | 3 | 3 | hsa-miR-3662 | -0.09 | -0.15 | N/A |
| RAB27B   | ENST00000262094.5 | RAB27B, member RAS oncogene family                                           | 5     | 7  | 1 | 5 | 1 | 1 | hsa-miR-3662 | -0.15 | -0.15 | N/A |
| PSMB1    | ENST00000262193.6 | proteasome (prosome, macropain) subunit, beta type, 1                        | 25836 | 4  | 0 | 2 | 2 | 0 | hsa-miR-3662 | 0     | -0.15 | N/A |
| PRPF18   | ENST00000378572.3 | pre-mRNA processing factor 18                                                | 551   | 1  | 1 | 0 | 0 | 0 | hsa-miR-3662 | -0.15 | -0.15 | N/A |
| PRIM2    | ENST00000607273.1 | primase, DNA, polypeptide 2 (58kDa)                                          | 32    | 1  | 0 | 1 | 0 | 1 | hsa-miR-3662 | -0.12 | -0.15 | N/A |
| PREPL    | ENST00000541738.1 | prolyl endopeptidase-like                                                    | 612   | 7  | 2 | 3 | 2 | 3 | hsa-miR-3662 | -0.07 | -0.15 | N/A |
| PPP1R12A | ENST00000261207.5 | protein phosphatase 1, regulatory subunit 12A                                | 276   | 8  | 2 | 3 | 3 | 1 | hsa-miR-3662 | -0.11 | -0.15 | N/A |

|           |                   |                                                                             |       |   |   |   |   |    |              |       |       |     |
|-----------|-------------------|-----------------------------------------------------------------------------|-------|---|---|---|---|----|--------------|-------|-------|-----|
| PLCH1     | ENST00000494598.1 | phospholipase C, eta 1                                                      | 19    | 1 | 0 | 1 | 0 | 0  | hsa-miR-3662 | -0.15 | -0.15 | N/A |
| PEX7      | ENST00000541292.1 | peroxisomal biogenesis factor 7                                             | 661   | 3 | 1 | 2 | 0 | 1  | hsa-miR-3662 | -0.1  | -0.15 | N/A |
| NUSAP1    | ENST00000260359.6 | nucleolar and spindle associated protein 1                                  | 686   | 1 | 1 | 0 | 0 | 0  | hsa-miR-3662 | -0.13 | -0.15 | N/A |
| NPR3      | ENST00000265074.8 | natriuretic peptide receptor C/guanylate cyclase C (atrionatriuretic peptic | 517   | 9 | 1 | 4 | 4 | 2  | hsa-miR-3662 | -0.09 | -0.15 | N/A |
| NPL       | ENST00000367553.1 | N-acetylneuraminate pyruvate lyase (dihydrodipicolinate synthase)           | 19    | 1 | 1 | 0 | 0 | 1  | hsa-miR-3662 | -0.15 | -0.15 | N/A |
| NEGR1     | ENST00000357731.5 | neuronal growth regulator 1                                                 | 28    | 7 | 1 | 1 | 5 | 13 | hsa-miR-3662 | -0.04 | -0.15 | N/A |
| NAA20     | ENST00000310450.4 | N(alpha)-acetyltransferase 20, NatB catalytic subunit                       | 1586  | 1 | 1 | 0 | 0 | 0  | hsa-miR-3662 | -0.15 | -0.15 | N/A |
| MYL12A    | ENST00000217652.3 | myosin, light chain 12A, regulatory, non-sarcomeric                         | 52535 | 1 | 0 | 1 | 0 | 2  | hsa-miR-3662 | -0.15 | -0.15 | N/A |
| MSANTD2   | ENST00000239614.4 | Myb/SANT-like DNA-binding domain containing 2                               | 50    | 5 | 0 | 5 | 0 | 0  | hsa-miR-3662 | -0.08 | -0.15 | N/A |
| MRPL42    | ENST00000549982.1 | mitochondrial ribosomal protein L42                                         | 1172  | 3 | 0 | 0 | 3 | 2  | hsa-miR-3662 | -0.03 | -0.15 | N/A |
| MBLAC2    | ENST00000316610.6 | metallo-beta-lactamase domain containing 2                                  | 498   | 2 | 1 | 1 | 0 | 1  | hsa-miR-3662 | -0.11 | -0.15 | N/A |
| KRTAP4-11 | ENST00000391413.2 | keratin associated protein 4-11                                             | 5     | 2 | 1 | 1 | 0 | 0  | hsa-miR-3662 | -0.15 | -0.15 | N/A |
| KIAA1958  | ENST00000337530.6 | KIAA1958                                                                    | 117   | 8 | 1 | 5 | 2 | 6  | hsa-miR-3662 | -0.11 | -0.15 | N/A |
| IPMK      | ENST00000373935.3 | inositol polyphosphate multikinase                                          | 196   | 6 | 2 | 1 | 3 | 4  | hsa-miR-3662 | -0.04 | -0.15 | N/A |
| HIST1H4H  | ENST00000289352.1 | histone cluster 1, H4h                                                      | 10    | 2 | 0 | 1 | 1 | 0  | hsa-miR-3662 | -0.15 | -0.15 | N/A |
| HILPDA    | ENST00000257696.4 | hypoxia inducible lipid droplet-associated                                  | 431   | 2 | 1 | 0 | 1 | 0  | hsa-miR-3662 | -0.15 | -0.15 | N/A |
| HECTD2    | ENST00000371667.1 | HECT domain containing E3 ubiquitin protein ligase 2                        | 1514  | 3 | 0 | 1 | 2 | 1  | hsa-miR-3662 | -0.14 | -0.15 | N/A |
| HDAC2     | ENST00000519065.1 | histone deacetylase 2                                                       | 1701  | 6 | 1 | 2 | 3 | 4  | hsa-miR-3662 | -0.08 | -0.15 | N/A |
| GPRC5A    | ENST00000014914.5 | G protein-coupled receptor, family C, group 5, member A                     | 341   | 6 | 2 | 2 | 2 | 2  | hsa-miR-3662 | 0     | -0.15 | N/A |
| FAM199X   | ENST00000493442.1 | family with sequence similarity 199, X-linked                               | 856   | 7 | 2 | 4 | 1 | 2  | hsa-miR-3662 | -0.12 | -0.15 | N/A |
| EPB41L4B  | ENST00000374557.4 | erythrocyte membrane protein band 4.1 like 4B                               | 135   | 5 | 1 | 3 | 1 | 3  | hsa-miR-3662 | -0.03 | -0.15 | N/A |
| EIF5A2    | ENST00000474096.1 | eukaryotic translation initiation factor 5A2                                | 443   | 6 | 3 | 0 | 3 | 3  | hsa-miR-3662 | -0.03 | -0.15 | N/A |
| DYNLL2    | ENST00000579991.2 | dynein, light chain, LC8-type 2                                             | 1162  | 5 | 0 | 2 | 3 | 10 | hsa-miR-3662 | -0.02 | -0.15 | N/A |
| CPEB3     | ENST00000412050.4 | cytoplasmic polyadenylation element binding protein 3                       | 48    | 7 | 2 | 4 | 1 | 2  | hsa-miR-3662 | -0.13 | -0.15 | N/A |
| CNOT2     | ENST00000229195.3 | CCR4-NOT transcription complex, subunit 2                                   | 1189  | 8 | 2 | 3 | 3 | 7  | hsa-miR-3662 | -0.02 | -0.15 | N/A |
| CERS6     | ENST00000305747.6 | ceramide synthase 6                                                         | 1932  | 6 | 2 | 1 | 3 | 3  | hsa-miR-3662 | -0.13 | -0.15 | N/A |
| CD226     | ENST00000581982.1 | CD226 molecule                                                              | 8     | 5 | 0 | 5 | 0 | 5  | hsa-miR-3662 | -0.06 | -0.15 | N/A |
| CCDC126   | ENST00000307471.3 | coiled-coil domain containing 126                                           | 846   | 1 | 1 | 0 | 0 | 2  | hsa-miR-3662 | -0.14 | -0.15 | N/A |
| C1orf210  | ENST00000523677.1 | chromosome 1 open reading frame 210                                         | 43    | 2 | 0 | 2 | 0 | 1  | hsa-miR-3662 | -0.01 | -0.15 | N/A |
| C16orf45  | ENST00000300006.4 | chromosome 16 open reading frame 45                                         | 60    | 2 | 1 | 0 | 1 | 2  | hsa-miR-3662 | -0.12 | -0.15 | N/A |
| BEND4     | ENST00000504360.1 | BEN domain containing 4                                                     | 187   | 6 | 3 | 1 | 2 | 4  | hsa-miR-3662 | -0.14 | -0.15 | N/A |
| ATG12     | ENST00000500945.2 | autophagy related 12                                                        | 1822  | 2 | 1 | 1 | 0 | 3  | hsa-miR-3662 | -0.11 | -0.15 | N/A |
| ATF7IP    | ENST00000261168.4 | activating transcription factor 7 interacting protein                       | 667   | 8 | 2 | 3 | 3 | 3  | hsa-miR-3662 | -0.14 | -0.15 | N/A |
| ACADSB    | ENST00000358776.4 | acyl-CoA dehydrogenase, short/branched chain                                | 239   | 7 | 3 | 2 | 2 | 2  | hsa-miR-3662 | -0.07 | -0.15 | N/A |
