# Supplementary material
Source: PubMed Central journal article supplement (PMC8781987)
Supplement: NIHMS1750159-supplement-Supplementary_Table_S2.pdf [file NIHMS1750159-supplement-Supplementary_Table_S2.pdf]

**Table S2. Identification of potential candidate target genes of miR-3662 by a combined RNA-seq and Targetscan data**

| Symbol   | GeneID | Scr-1_FPKM | Scr-2_FPKM | KO-1_FPKM | KO-2_FPKM | Length | log2Ratio(Group3662/Control) | q-value(Storey et al. 2003) | p-value     | R value |
|----------|--------|------------|------------|-----------|-----------|--------|------------------------------|-----------------------------|-------------|---------|
| ACADSB   | 36     | 2.59       | 2.14       | 5.05      | 4.9       | 5941   | 1.071304785                  | 5.96917E-66                 | 1.31342E-66 | -0.122  |
| ADHFE1   | 137872 | 0.22       | 0.22       | 0.35      | 0.7       | 1907   | 1.217887365                  | 0.000486421                 | 0.000550809 | -0.164  |
| ALDH3A2  | 224    | 10.98      | 14.17      | 36.81     | 26.82     | 3715   | 1.33756377                   | 0                           | 0           | -0.044  |
| ARHGEF6  | 9459   | 0.11       | 0.16       | 0.94      | 0.75      | 4820   | 2.66562365                   | 3.45445E-33                 | 1.33704E-33 | -0.005  |
| C18orf32 | 497661 | 4.71       | 5.91       | 10.61     | 13.68     | 1568   | 1.182922243                  | 2.30617E-48                 | 6.59638E-49 | -0.017  |
| CSRNP3   | 80034  | 0.08       | 0.05       | 0.18      | 0.11      | 11788  | 1.136138175                  | 1.14176E-05                 | 1.13156E-05 | -0.17   |
| DNAJC10  | 54431  | 12.46      | 8.17       | 19.66     | 24.1      | 5946   | 1.090295322                  | 4.2513E-295                 | 1.926E-296  | 0.021   |
| HBP1     | 26959  | 2.97       | 4.66       | 8.35      | 9.71      | 2791   | 1.239189376                  | 6.848E-70                   | 1.43216E-70 | -0.167  |
| IL6      | 3569   | 0.33       | 0.46       | 1.07      | 1.04      | 1172   | 1.326821737                  | 5.90712E-05                 | 6.1748E-05  | 0.005   |
| IMPACT   | 55364  | 4.88       | 4.48       | 8.98      | 9.88      | 3764   | 1.006447433                  | 8.8985E-71                  | 1.83376E-71 | -0.087  |
| KLRC2    | 3822   | 0.03       | 0.55       | 1.13      | 0.61      | 1223   | 1.569315364                  | 1.93909E-05                 | 1.95501E-05 | 0.044   |
| LEPROT   | 54741  | 11.18      | 13         | 21.33     | 27.54     | 3576   | 1.077883708                  | 1.5543E-210                 | 1.0373E-211 | -0.167  |
| LOX      | 4015   | 4.24       | 2.83       | 6.38      | 8.46      | 5332   | 1.049376078                  | 4.81521E-83                 | 8.64942E-84 | -0.074  |
| MAP2K6   | 5608   | 0.11       | 0.25       | 1.14      | 1.03      | 4050   | 2.194623308                  | 4.19315E-26                 | 1.91561E-26 | -0.014  |
| MBNL3    | 55796  | 0.48       | 0.35       | 1.31      | 1.39      | 11284  | 1.713301625                  | 1.35156E-70                 | 2.78853E-71 | -0.012  |
| MGST3    | 4259   | 14.32      | 16.48      | 44.05     | 49.75     | 1527   | 1.598638486                  | 3.1303E-279                 | 1.4871E-280 | 0.044   |
| RAB27B   | 5874   | 0.2        | 0.19       | 3.51      | 3.21      | 6769   | 4.157540652                  | 2.9281E-267                 | 1.4843E-268 | -0.159  |
| RAB3B    | 5865   | 0.03       | 0.04       | 0.07      | 0.14      | 12844  | 1.622960386                  | 5.81412E-07                 | 5.29163E-07 | 0.003   |
| RORA     | 6095   | 0.65       | 0.42       | 1.1       | 1.55      | 10696  | 1.311655289                  | 1.18138E-44                 | 3.59755E-45 | -0.091  |
| SH3TC2   | 79628  | 0.52       | 0.57       | 1.2       | 1.04      | 26588  | 1.036904037                  | 5.69695E-64                 | 1.29328E-64 | 0.011   |
| SLC30A4  | 7782   | 1.62       | 1.86       | 2.9       | 2.84      | 4420   | 1.002679221                  | 1.12317E-25                 | 5.18338E-26 | -0.085  |
| SLC5A3   | 6526   | 2.78       | 2.33       | 7.48      | 5.87      | 11623  | 1.383856825                  | 7.7145E-257                 | 4.1373E-258 | -0.011  |
| TMEM106B | 54664  | 2.33       | 1.67       | 4.14      | 4.48      | 6320   | 1.107431804                  | 2.07435E-64                 | 4.67603E-65 | -0.15   |
| TMEM135  | 65084  | 1.75       | 1.35       | 3.27      | 3.67      | 9086   | 1.163030978                  | 1.55646E-80                 | 2.86062E-81 | -0.072  |
| TP53INP1 | 94241  | 0.19       | 0.22       | 1.21      | 0.93      | 5635   | 2.396084399                  | 2.62592E-43                 | 8.2119E-44  | -0.083  |
| ZBTB20   | 26137  | 0.14       | 0.11       | 0.35      | 0.29      | 26201  | 1.304203434                  | 1.43302E-26                 | 6.4782E-27  | -0.103  |
