# Supplementary material
Source: PubMed Central journal article supplement (PMC8781987)
Supplement: NIHMS1750159-supplement-Supplementary_Table_S3.pdf [file NIHMS1750159-supplement-Supplementary_Table_S3.pdf]

**Table S3a. The potential off-targets accessed using the Cas-OFFinder off-target searching tool**

| sgRNA   | Target Sequence             | Bulge Type | Bulge Size | Mismatch | Number of Found Targets |
|---------|-----------------------------|------------|------------|----------|-------------------------|
| sgRNA-1 | CACCACAAATCAGCCAAACTCTGTNRG | X          | 0          | 2        | 1                       |
| sgRNA-1 | CACCACAAATCAGCCAAACTCTGTNRG | X          | 0          | 4        | 5                       |
| sgRNA-1 | CACCACAAATCAGCCAAACTCTGTNRG | X          | 0          | 5        | 26                      |
| sgRNA-1 | CACCACAAATCAGCCAAACTCTGTNRG | X          | 0          | 6        | 321                     |
| sgRNA-1 | CACCACAAATCAGCCAAACTCTGTNRG | X          | 0          | 7        | 2624                    |
| sgRNA-1 | CACCACAAATCAGCCAAACTCTGTNRG | X          | 0          | 8        | 16176                   |
| sgRNA-1 | CACCACAAATCAGCCAAACTCTGTNRG | X          | 0          | 9        | 83760                   |
| sgRNA-2 | CACCCTCATCATTTTCAATATGAANRG | X          | 0          | 3        | 1                       |
| sgRNA-2 | CACCCTCATCATTTTCAATATGAANRG | X          | 0          | 4        | 9                       |
| sgRNA-2 | CACCCTCATCATTTTCAATATGAANRG | X          | 0          | 5        | 127                     |
| sgRNA-2 | CACCCTCATCATTTTCAATATGAANRG | X          | 0          | 6        | 794                     |
| sgRNA-2 | CACCCTCATCATTTTCAATATGAANRG | X          | 0          | 7        | 4868                    |
| sgRNA-2 | CACCCTCATCATTTTCAATATGAANRG | X          | 0          | 8        | 26948                   |
| sgRNA-2 | CACCCTCATCATTTTCAATATGAANRG | X          | 0          | 9        | 120873                  |

**Table S3b. The potential mismatch  $\leq 4$  off-target regions accessed using the Cas-OFFinder off-target searching tool**

| Target DNA sequence         | Chromosome | Position  | Location                     | Direction | Mismatches | Nearby Gene | Position to Gene |
|-----------------------------|------------|-----------|------------------------------|-----------|------------|-------------|------------------|
| aAgCACAAATCAGCCAAACTCTGTTGG | chr6       | 134979327 | chr6:134,979,127-134,979,527 | -         | 2          | HBS1L       | Intron 14-15     |
| CACCCTCATCATTTTCAatTGAATAG  | chr14      | 75029254  | chr14:75029054-75029454      | +         | 3          | MLH3        | Intron 9-10      |
| CACCCTCATCATcTTCAAgTGAATAG  | chr3       | 2319531   | chr3:2319331-2319731         | -         | 4          | CNTN4       | Intron 1-2       |
| CAcCCTCATCATcTTCAAatTGAATAG | chr6       | 65029636  | chr6:65029436-65029836       | -         | 4          | EYS         | Intron 13-14     |
| CACCACAcAgCAGCCAgAtTCTGTGGG | chr15      | 26660595  | chr15:26660395-26660795      | +         | 4          | GABRB3      | Intron 3-4       |
| actaCTCATCATTTTCAATATGAATGG | chr6       | 134979362 | chr6:134979162-134979562     | +         | 4          | HBS1L       | Intron 13-14     |
| CACCcCAAATCAGCaAAAtTCTGgCAG | chr2       | 12481111  | chr2:12480911-12481311       | +         | 4          | MIR3681HG   | Intron 4-5       |
| CcCCCTCATCATTTTCAtaAgGAACAG | chr20      | 4630067   | chr20:4,629,867-4,630,267    | -         | 4          | RPS4XP2     | Intron 1-2       |
| CACCCTCATCATcTTCAtcATGcACAG | chr20      | 10241310  | chr20:10241110-10241510      | +         | 4          | SNAP25      | Intron 1-2       |
| CACCCTCAaCtTcTTCAATATcAATAG | chr5       | 35769486  | chr5:35,769,286-35,769,686   | -         | 4          | SPEF2       | Intron 26-27     |
| CACCACAAaCAGCtcAACTCTGaAAG  | chr9       | 113099568 | chr9:113,099,368-113,099,768 | +         | 4          | amorph      |                  |
| CcCCACAAATCAGaaAAGCTCTGTAAG | chr10      | 3671670   | chr10:3,671,470-3,671,870    | +         | 4          | amorph      |                  |
| CAGcAgAAATCAGCCAAACTCTaaGAG | chr18      | 24354628  | chr18:24,354,428-24,354,828  | +         | 4          | amorph      |                  |
| CACCCTCATCATcTTCAiTTGAgTAG  | chr7       | 88609588  | chr7:88609388-88609788       | -         | 4          | amorph      |                  |
| CAcCCTCATCATcTTCAcTTTGAATAG | chr2       | 161620915 | chr2:161620715-161621115     | -         | 4          | amorph      |                  |
| CAttCaCATCATTTTCAAgATGAATGG | chr14      | 26367404  | chr14:26367204-26367604      | -         | 4          | amorph      |                  |
