# Supplementary material
Source: PubMed Central journal article supplement (PMC8781987)
Supplement: NIHMS1750159-supplement-Supplementary_Table_S4.pdf [file NIHMS1750159-supplement-Supplementary_Table_S4.pdf]

**Table S4. The sequences of primer, siRNA, sgRNA, miRNA mimic and inhibitor and DNA constructs used in this study**

|                        |                                                                |
|------------------------|----------------------------------------------------------------|
| PX458-miR3662-sgRNA-1  | forward, 5'-CACCAAAAATCAGCCAAACTCTGT-3'                        |
|                        | reverse, 5'- AAACACAGAGTTTGGCTGATTTGT-3'                       |
| PX458-miR3662-sgRNA-2  | forward, 5'-CACCCATCATTTTTCAATATGAA-3'                         |
|                        | reverse, 5'-AAACTTCATATTGAAAATGATGAG-3'                        |
| miR3662-DNA-test       | forward, 5'-GTCACCTTATGTTTAGGGTG-3'                            |
|                        | reverse, 5'-CACCTCGATATCAAACCATA-3'                            |
| pSLQ2837-gRNA1         | GAGAACCACCTTGTGgactgagtgtacatgtcccatGTTTAAGAGCTAAGCTGGAAACAG   |
| pSLQ2837-gRNA2         | GAGAACCACCTTGTGgcaatcaagaactatccacagGTTTAAGAGCTAAGCTGGAAACAG   |
| pSLQ2837-gRNA3         | GAGAACCACCTTGTGggaacagtgtacatgattgGTTTAAGAGCTAAGCTGGAAACAG     |
| RNU6B                  | forward, 5'-CCCTGACACGCAAATTCGTGAAG-3'                         |
|                        | reverse, miScript SYBR Green PCR kits Universal Primer         |
| hsa-mir16-5p           | forward, 5'-CCCTAGCAGCACGTAAATATTGGCG-3'                       |
|                        | reverse, miScript SYBR Green PCR kits Universal Primer         |
| HBP1                   | forward, 5'-CGACCAGTCCACAAAGTCCA-3'                            |
|                        | reverse, 5'- TCACTATTTGCCCTTTCGTGTC-3'                         |
| GAPDH                  | forward, 5'-CCCCTTCATTGACCTCAACTACAT-3'                        |
|                        | reverse, 5'-CGCTCCTGGAAGATGGTGA -3'                            |
| pmirGLO-HBP1-3'UTR-WT  | forward, 5'-AAACTAGCGGCCGCTAGTAGCTAAAACATCAACATTTTAAT -3'      |
|                        | reverse, 5'-CTAGATTAATAATGTTGATAGTTTTAGCTACTAGCGGCCGCTAGTTT-3' |
| pmirGLO-HBP1-3'UTR-MUT | forward, 5'-AAACTAGCGGCCGCTAGTAGCTAAAACATCAAAAAT-3'            |
|                        | reverse, 5'-CTAGATTTTGTAGTTTTAGCTACTAGCGGCCGCTAGTTT -3'        |
| miR-3662-mimics        | Sense 5'-GAAAAUGAUGAGUAGUGACUGAUG-3'                           |
| miR-3662-inhibitor     | Sense 5'-CAUCAGUCACUACUCAUCAUUUUUC-3'                          |
| miRNA negative control | Sense 5'-UUCUCCGAACGUGUCACGUTT-3'                              |
| <i>HBP1</i> siRNA-1    | AAUUUAAAAAAAAUAUGUAACCTT                                       |
|                        | GUUACAUUUUUUUUAAAUUTTGG                                        |
| <i>HBP1</i> siRNA-2    | GCCAAGAGGCUACCAGAACTT                                          |
|                        | GUUCUGGUAGCCUCUUGGCTTGU                                        |
| PX458 vector           | pSpCas9(BB)-2A-GFP                                             |
| pSLQ2837 vector        | pLenti U6-spsgTRE3G CMV-mIFP                                   |

|                 |                                                                                                   |
|-----------------|---------------------------------------------------------------------------------------------------|
| pSLQ1922 vector | KRAB-Spdcas9,PiggyBac-Tre3g-KRAB-dcas9(Bstx1)-2NLS-p2A-sfGFP-SV40polyA/R (EF1a-Zeocin-f2A-rtTA-1) |
| pSLQ1932 vector | VPR-Spdcas9,PiggyBac-Tre3g-dcas9-VRP- sfGFP- SV40polyA/R (EF1a-Zeocin-f2A-rtTA-1)                 |
