# Supplementary material
Source: PubMed Central journal article supplement (PMC8781987)
Supplement: NIHMS1750159-supplement-Supplementary_Table_S5.pdf [file NIHMS1750159-supplement-Supplementary_Table_S5.pdf]

**Table S5. Establishment of CRISPR cell models used in this study**

| Name                 | Stably express transfected DNA constructs                                                          |
|----------------------|----------------------------------------------------------------------------------------------------|
| MDA-MD-231+1922      | KRAB-Spdcas9, PiggyBac-Tre3g-KRAB-dcas9(Bstx1)-2NLS-p2A-sfGFP-SV40polyA/R (EF1a-Zeocin-f2A-rtTA-1) |
| HEK293T+1922         | KRAB-Spdcas9, PiggyBac-Tre3g-KRAB-dcas9(Bstx1)-2NLS-p2A-sfGFP-SV40polyA/R (EF1a-Zeocin-f2A-rtTA-1) |
| MDA-MD-231+1932      | VPR-Spdcas9, PiggyBac-Tre3g-dcas9-VRP- sfGFP- SV40polyA/R (EF1a-Zeocin-f2A-rtTA-1)                 |
| HEK293T+1932         | VPR-Spdcas9,PiggyBac-Tre3g-dcas9-VRP- sfGFP- SV40polyA/R (EF1a-Zeocin-f2A-rtTA-1)                  |
| HEK293T+1922-gRNA    | pSLQ1922+pSLQ2837-CRISPRi gRNA                                                                     |
| HEK293T+1932-gRNA    | pSLQ1932+pSLQ2837-CRISPRa gRNA                                                                     |
| MDA-MD-231+1922-gRNA | pSLQ1922+pSLQ2837-CRISPRi gRNA                                                                     |
| MDA-MD-231+1932-gRNA | pSLQ1932+pSLQ2837-CRISPRa gRNA                                                                     |
